# Supplementary material for: Metabolomics and molecular networking approach for exploring the anti-diabetic activity of medicinal plants
Source: Royal Society of Chemistry journal article supplement (doi:10.1039/d3ra04037b), 2023-01-01
Supplement: d3ra04037b1.pdf [file d3ra04037b1.pdf]

ARTICLE

## Metabolomics and Molecular Networking Approach for Exploring the Anti-Diabetic Activity of Medicinal Plants

Received 00th January 20xx,  
Accepted 00th January 20xx

Arjun Prasad Timilsina<sup>†,a</sup>, Bimal Kumar Raut<sup>†,a</sup>, Chen Huo<sup>†,b</sup>, Karan Khadayat<sup>a</sup>, Prakriti Budhathoki<sup>a</sup>, Mandira Ghimire<sup>a</sup>, Rabin Budhathoki<sup>a</sup>, Niraj Aryal<sup>c</sup>, Ki Hyun Kim<sup>\*b</sup>, and Niranjan Parajuli<sup>\*a</sup>

DOI: 10.1039/x0xx00000x

### Content

1. Fig. S1: Mass spectrum of chebulic acid from *Terminalia chebula*;
2. Fig. S2: Mass spectrum of 2-*O*-caffeoyl hydroxycitric acid from *Terminalia chebula*;
3. Fig. S3: Mass spectrum of ellagic acid from *Terminalia chebula*;
4. Fig. S4: Mass spectrum of trigalloyllevoglucosan IX from *Terminalia chebula*;
5. Fig. S5: Mass spectrum of 2-*O*-feruloylhydroxycitric acid from *Terminalia chebula*;
6. Fig. S6: Mass spectrum of arjunglucoside I from *Terminalia chebula*;
7. Fig. S7: Mass spectrum of 23-galloylterminolic acid from *Terminalia chebula*;
8. Fig. S8: Mass spectrum of flavogallonic acid from *Terminalia chebula*;
9. Fig. S9: Mass spectrum of leucodelphinidin from *Terminalia chebula*;
10. Fig. S10: Mass spectrum of arjunolic acid from *Terminalia chebula*;
11. Fig. S11: Mass spectrum of bartogenic acid from *Terminalia chebula*;
12. Fig. S12: Mass spectrum of arjungenin from *Terminalia chebula*;
13. Fig. S13: Mass spectrum of (-)-epicatechin-3-*O*-gallate from *Terminalia chebula*;
14. Fig. S14: Mass spectrum of gambirinin B1 from *Terminalia chebula*;
15. Fig. S15: Mass spectrum of rotundioic acid from *Terminalia chebula*;
16. Fig. S16: Mass spectrum of butin from *Terminalia chebula*;
17. Fig. S17: Mass spectrum of gallocatechin or epigallocatechin from *Cleistocalyx operculatus*;
18. Fig. S18: Mass spectrum of 4,4'-di-*O*-methylellagic acid from *Cleistocalyx operculatus*;
19. Fig. S19: Mass spectrum of isoquercitrin from *Ficus lacor*;
20. Fig. S20: Mass spectrum of catechin from *Ficus semicordata*;
21. Fig. S21: Mass spectrum of procyanidin B2 from *Ficus semicordata*;
22. Fig. S22: Mass spectrum of ellagic acid-*O*-pentoside from *Cleistocalyx operculatus*;
23. Fig. S23: Mass spectrum of quinic acid from *Ficus lacor*;
24. Fig. S24: Mass spectrum of hydroxyl-6-gingerol-*O*- $\beta$ -D-glucuronide from *Ficus semicordata*;
25. Fig. S25: Mass spectrum of 3-*O*-galloylnorbergenin from *Cleistocalyx operculatus*;
26. Fig. S26: Mass spectrum of 3,4,5-tri-*O*-galloylquinic acid from *Cleistocalyx operculatus*;
27. Fig. S27: Mass spectrum of tri-*O*-methoxyellagic acid from *Cleistocalyx operculatus*;
28. Fig. S28: Mass spectrum of butyl isobutyl phthalate from *Cleistocalyx operculatus*;
29. Fig. S29: Mass spectrum of eudesmin from *Ficus lacor*;
30. Fig. S30: Mass spectrum of lasiodiplodin from *Ficus lacor*;
31. Fig. S31: Mass spectrum of 1-monopalmitin from *Ficus lacor*;
32. Fig. S32: Mass spectrum of  $\alpha$ -tocospiro B from *Ficus lacor*;

<sup>a</sup> Biological Chemistry Lab, Central Department of Chemistry, Tribhuvan University, Kirtipur, Kathmandu, 44618, Nepal

<sup>b</sup> School of Pharmacy, Sungkyunkwan University, Suwon 16419, Republic of Korea.

<sup>c</sup> Department of Biology, University of Florida, Gainesville, FL 32611, USA

\*Corresponding author: niranjan.parajuli@cdc.tu.edu.np (N.P.), Tel: +977-1-4332034 (N.P.); khkim83@skku.edu (K.H.K.); +82-31-290-7700 (K.H.K.)

† These authors contributed equally to this work.

Electronic Supplementary Information (ESI) available: [details of any supplementary information available should be included here]. See DOI: 10.1039/x0xx00000x

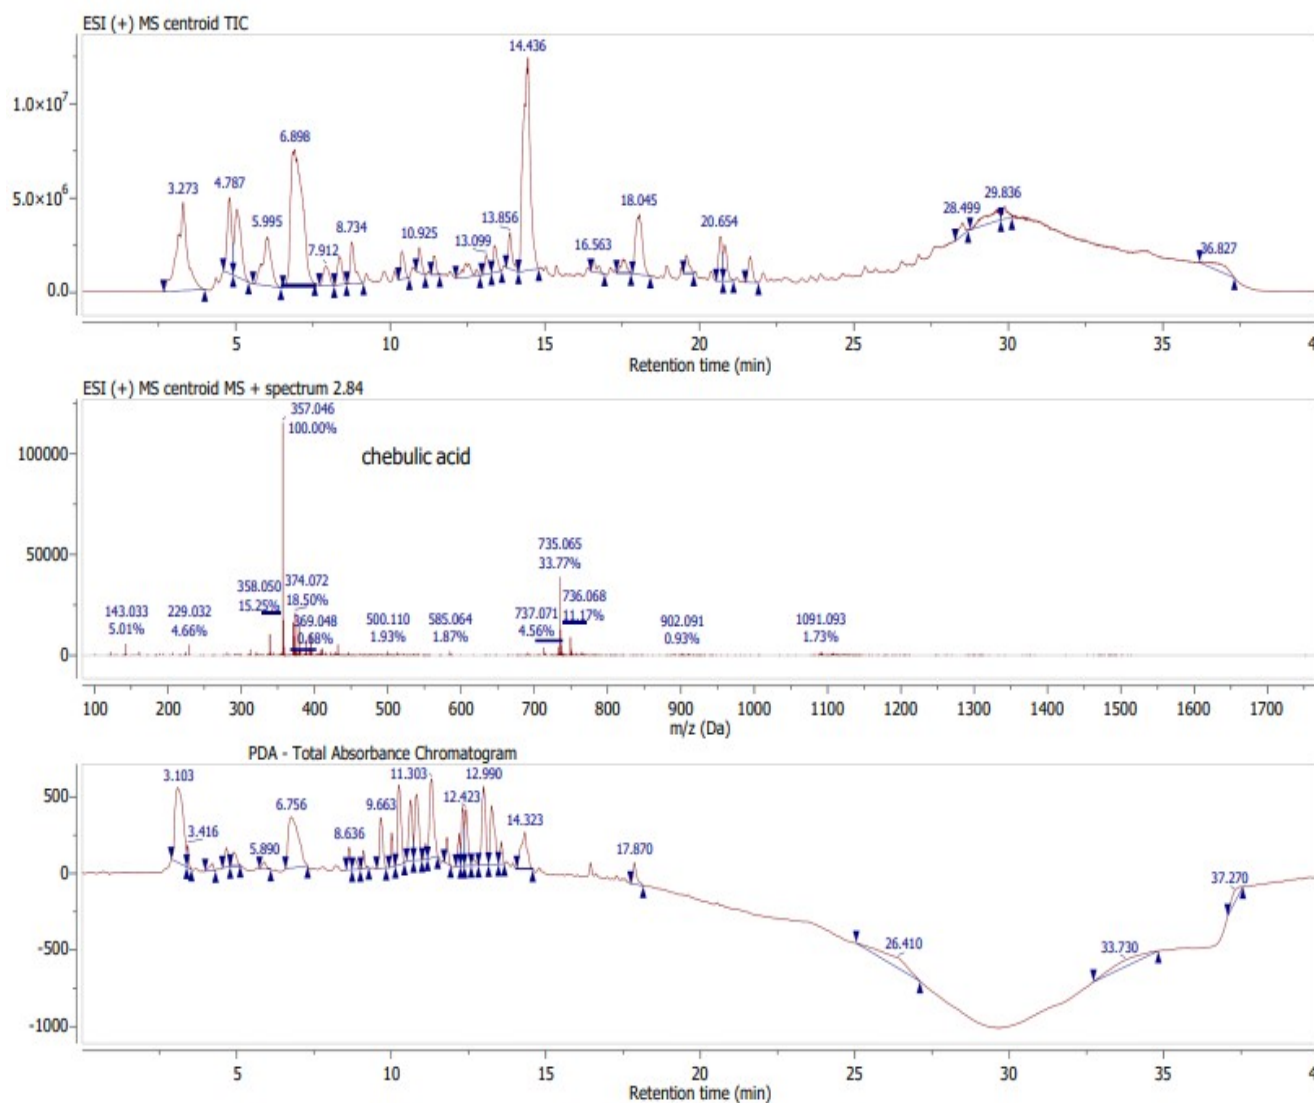

Fig. S1 Mass spectrum of chebulic acid from *Terminalia chebula*

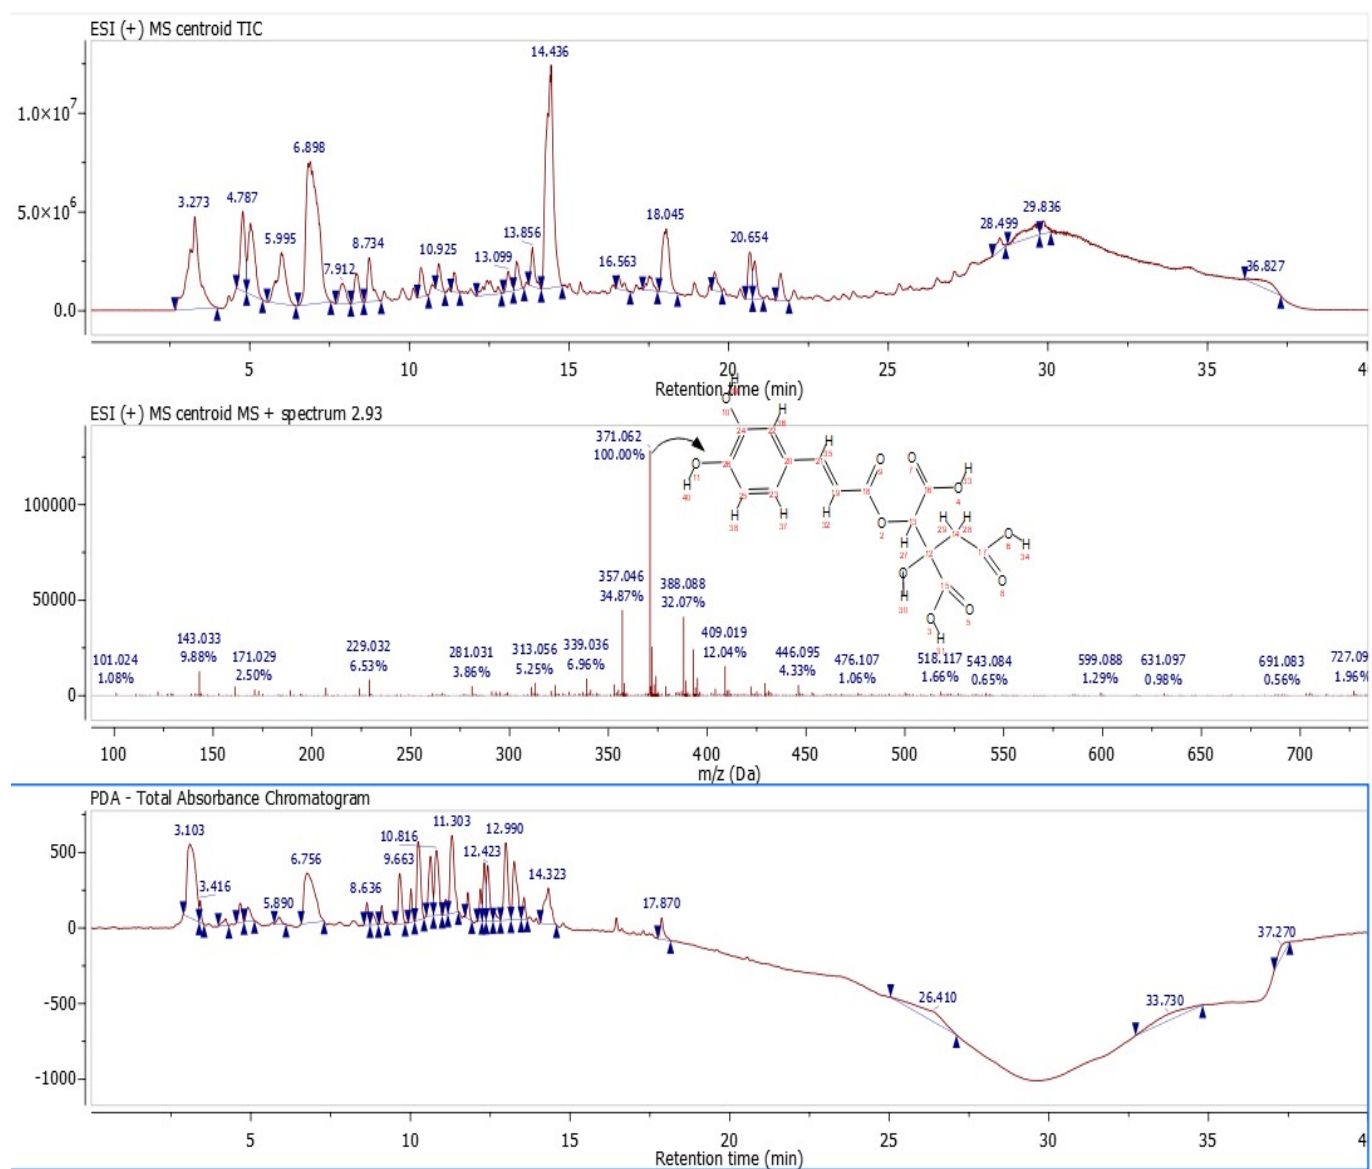

Fig. S2 Mass spectrum of 2-O-caffeoyl hydroxycitric acid from *Terminalia chebula*

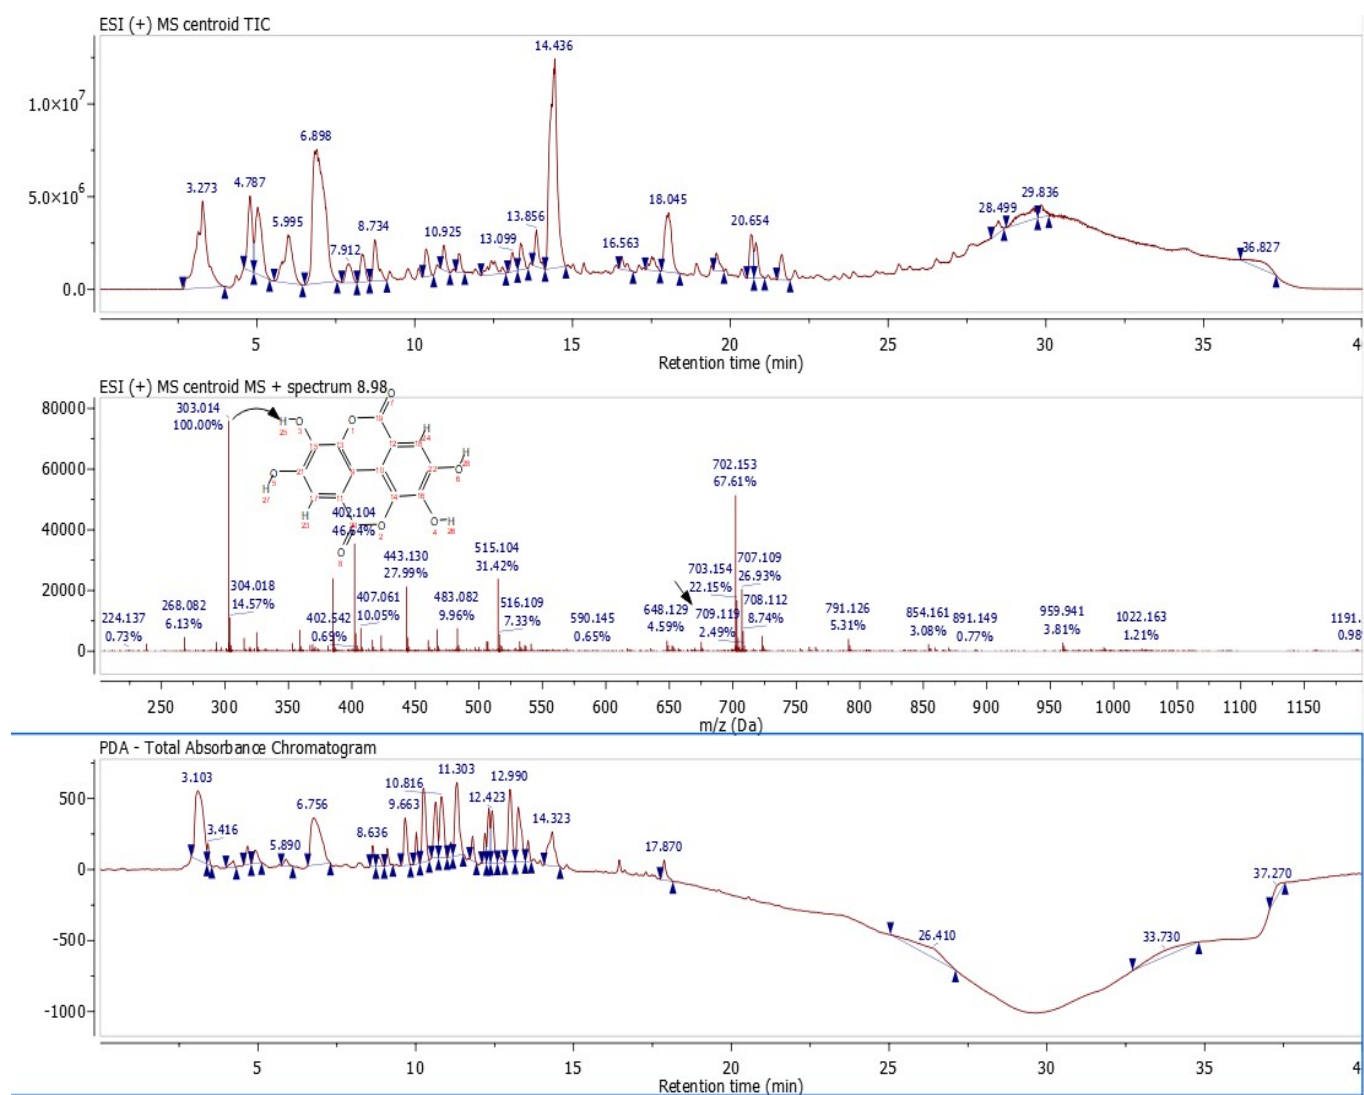

Fig. S3 Mass spectrum of ellagic acid from *Terminalia chebula*

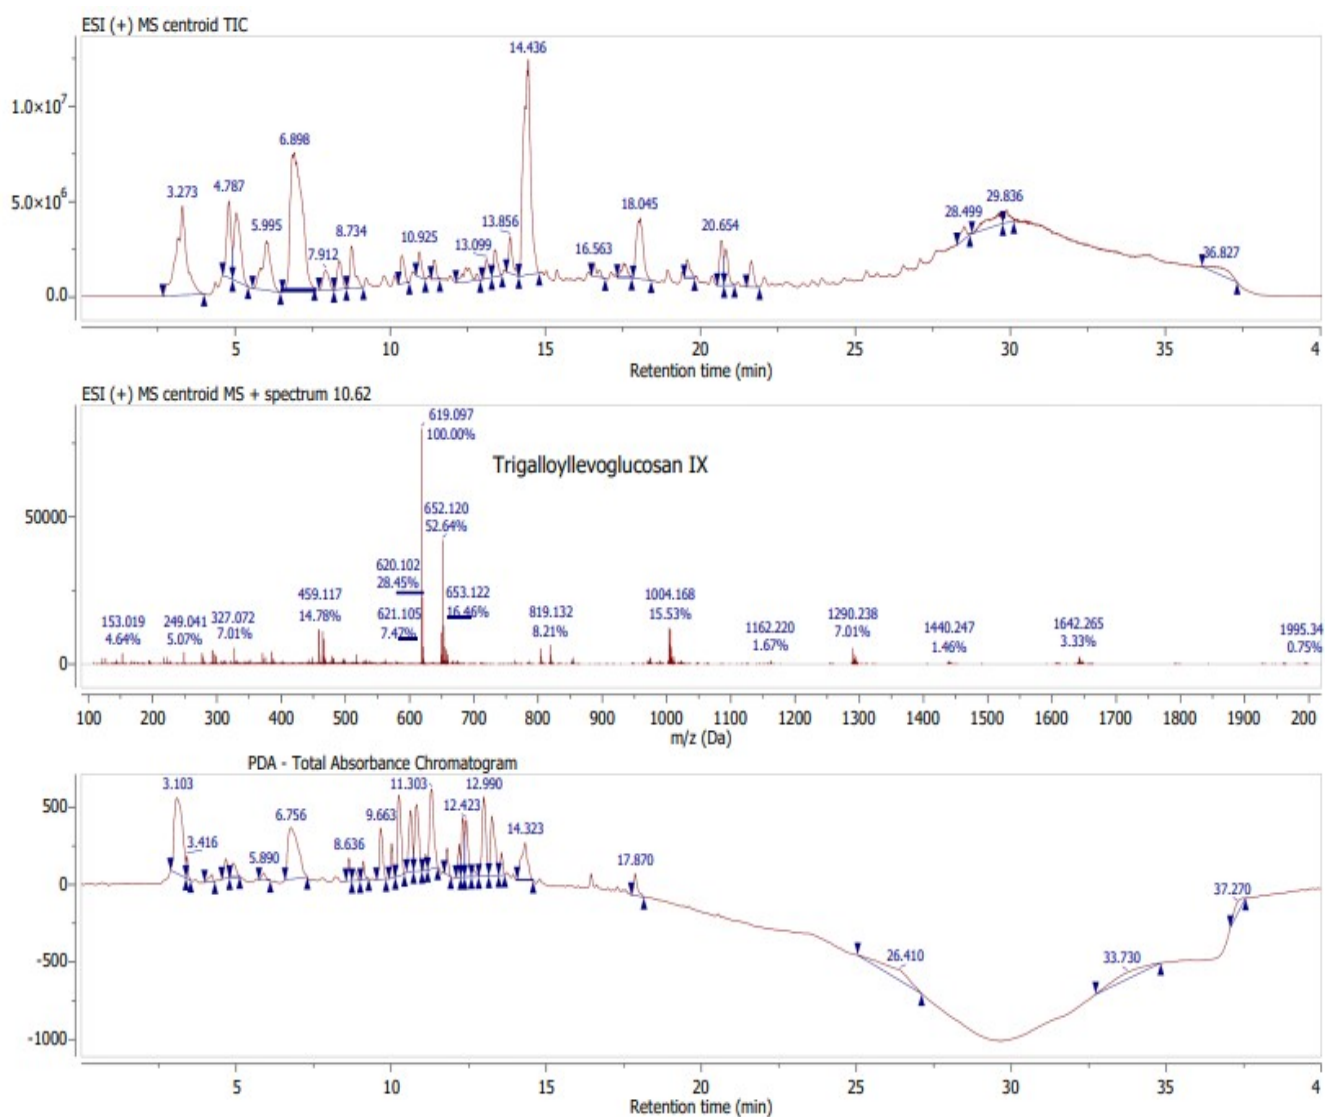

Fig. S4 Mass spectrum of trigalloyllevoglucosan IX from *Terminalia chebula*

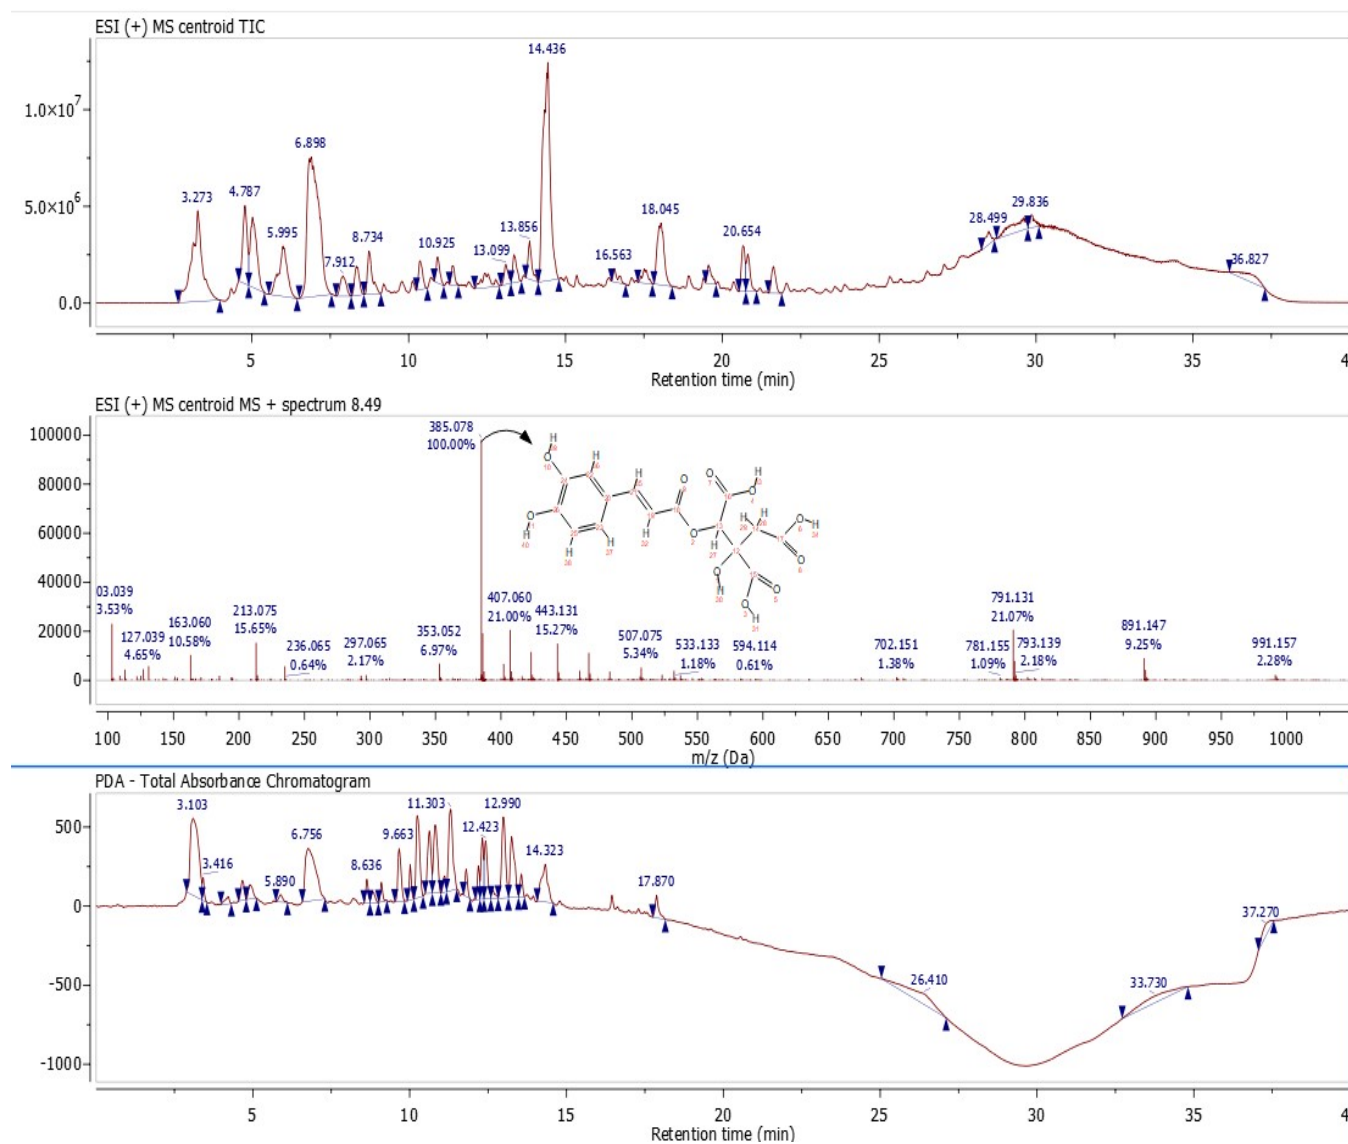

Fig. S5 Mass spectrum of 2-O-feruloylhydroxycitric acid from *Terminalia chebula*

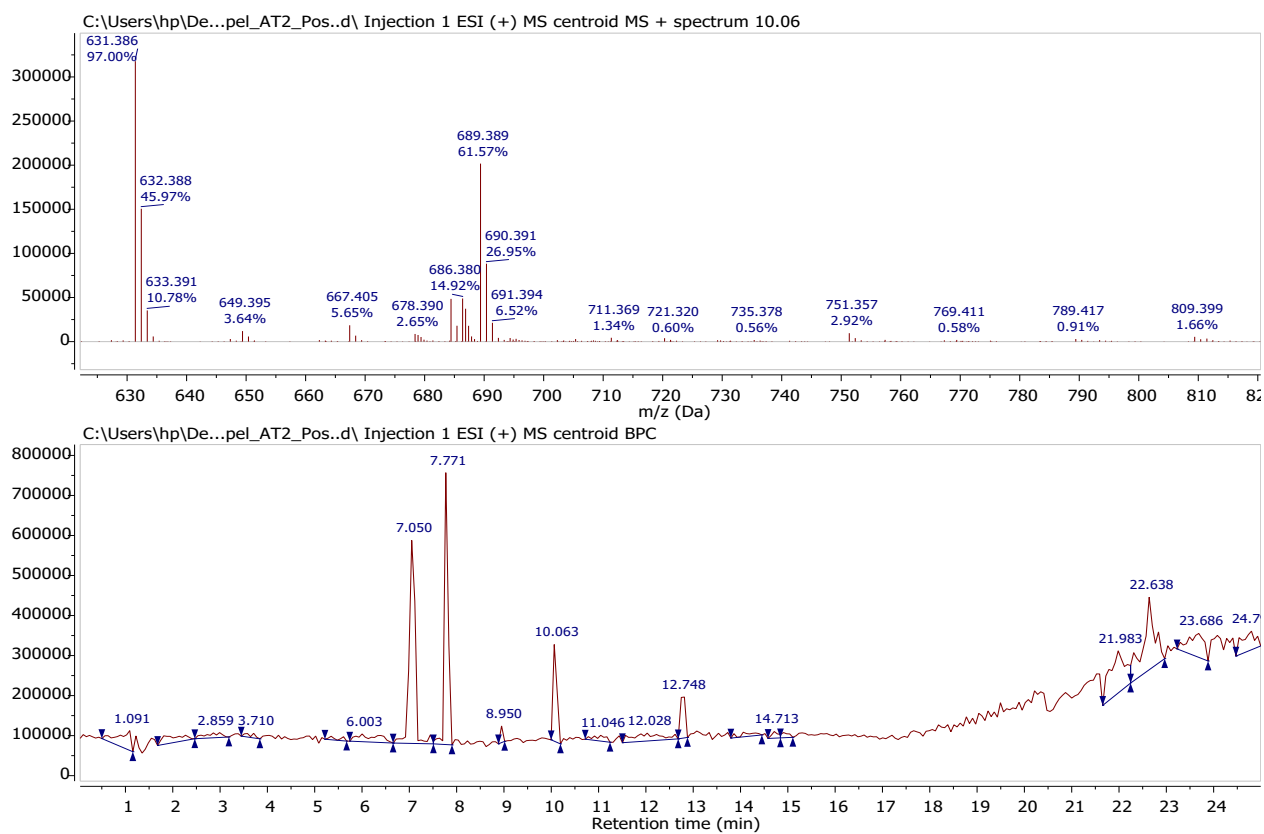

Fig. S6 Mass spectrum of arjunglucoside I from *Terminalia chebula* (bark)

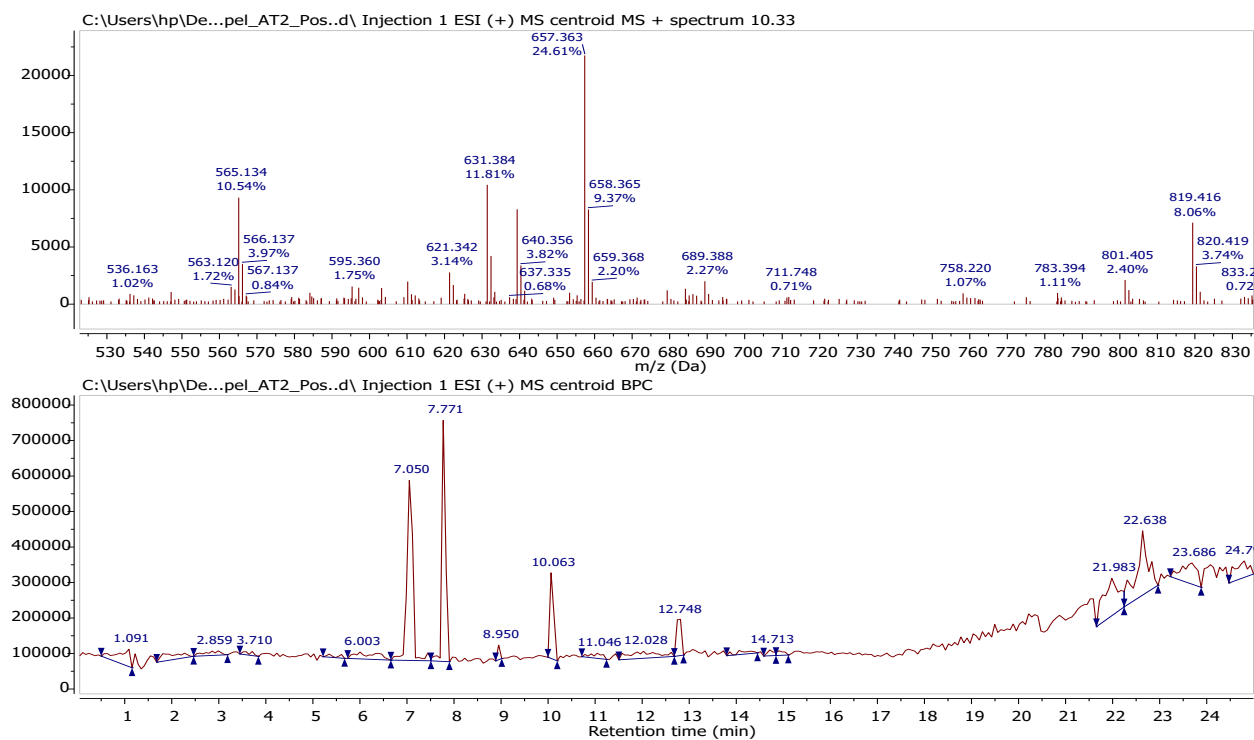

Fig. S7 Mass spectrum of 23-galloylterminolic acid from *Terminalia chebula* (bark)



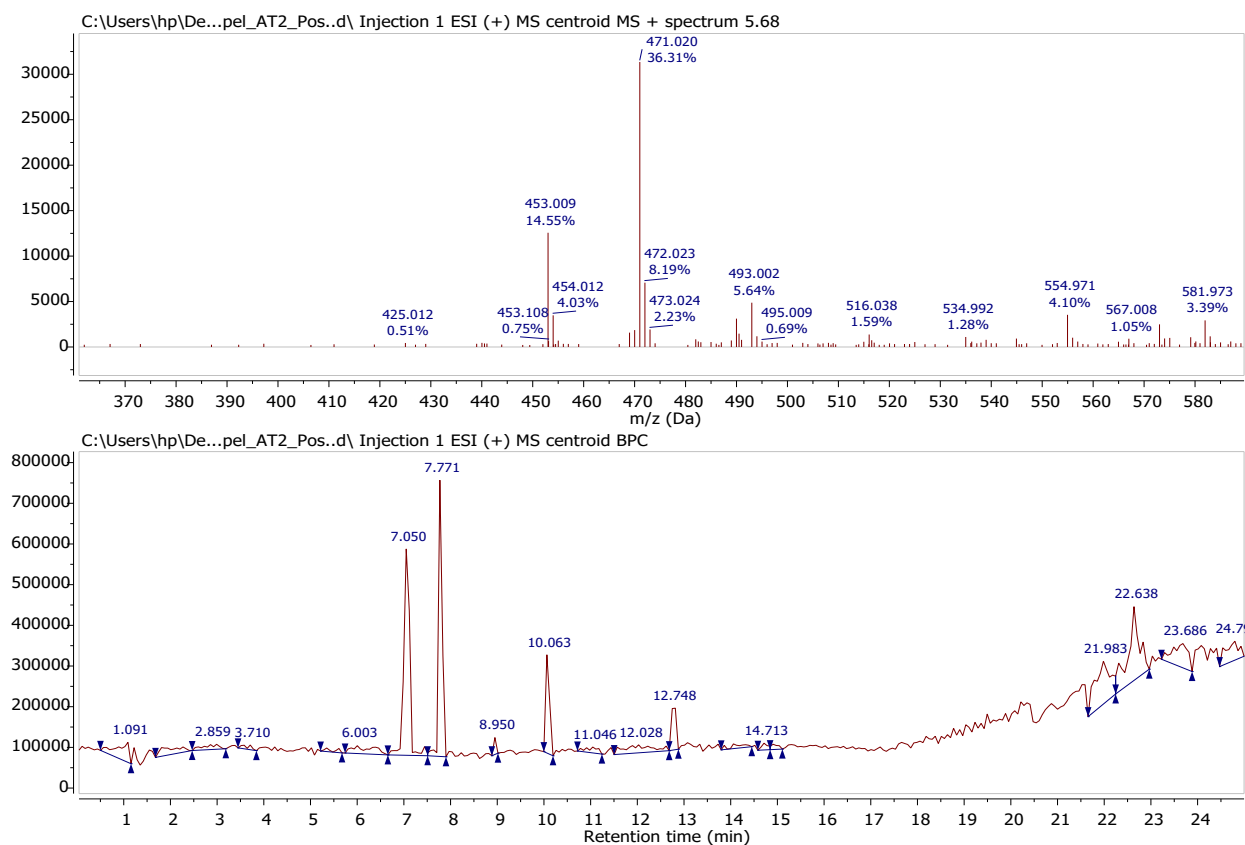

Fig. S8 Mass spectrum of flavogallonic acid from *Terminalia chebula* (bark)

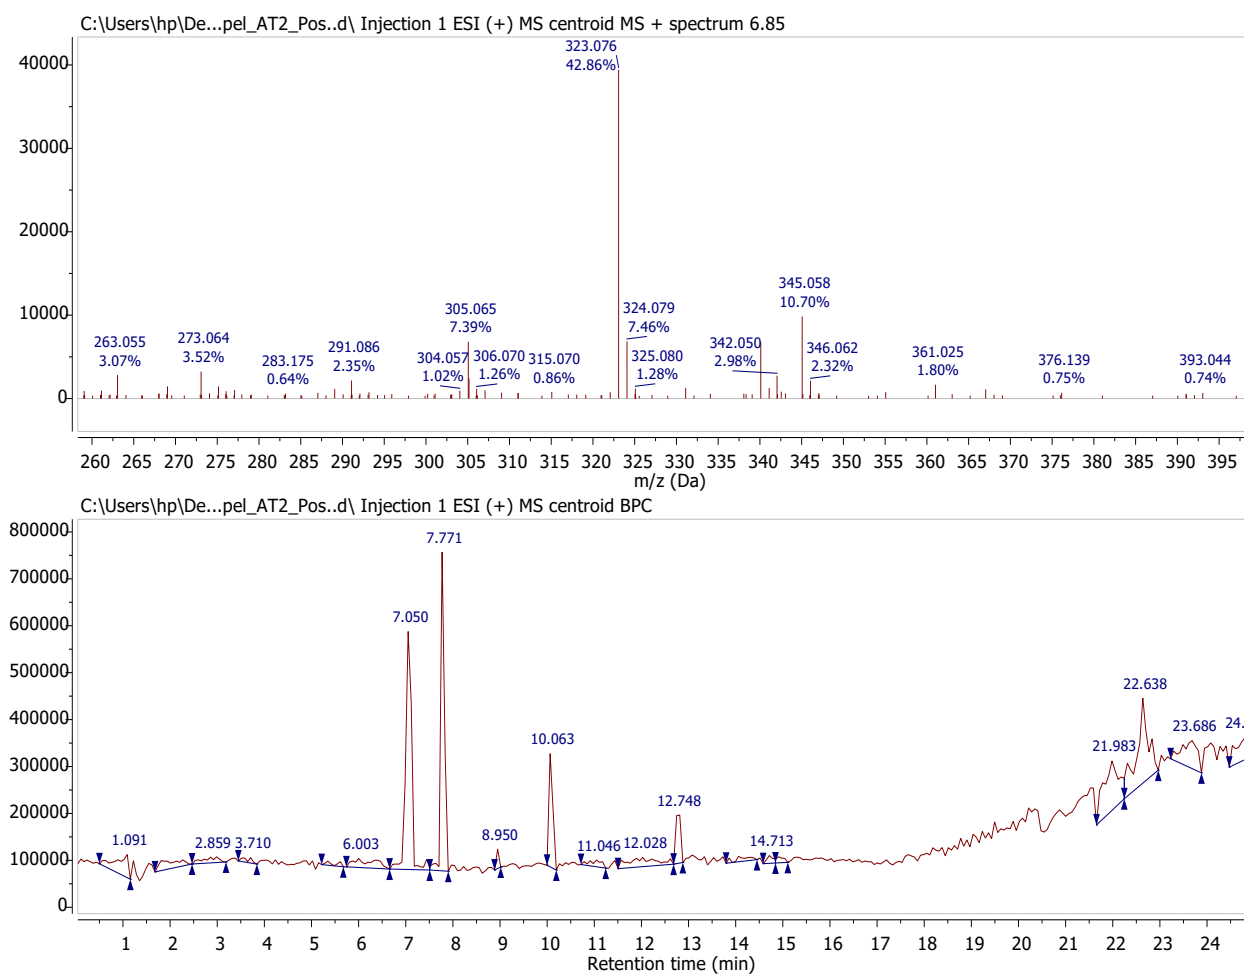

Fig. S9 Mass spectrum of leucodelphinidin from *Terminalia chebula* (bark)

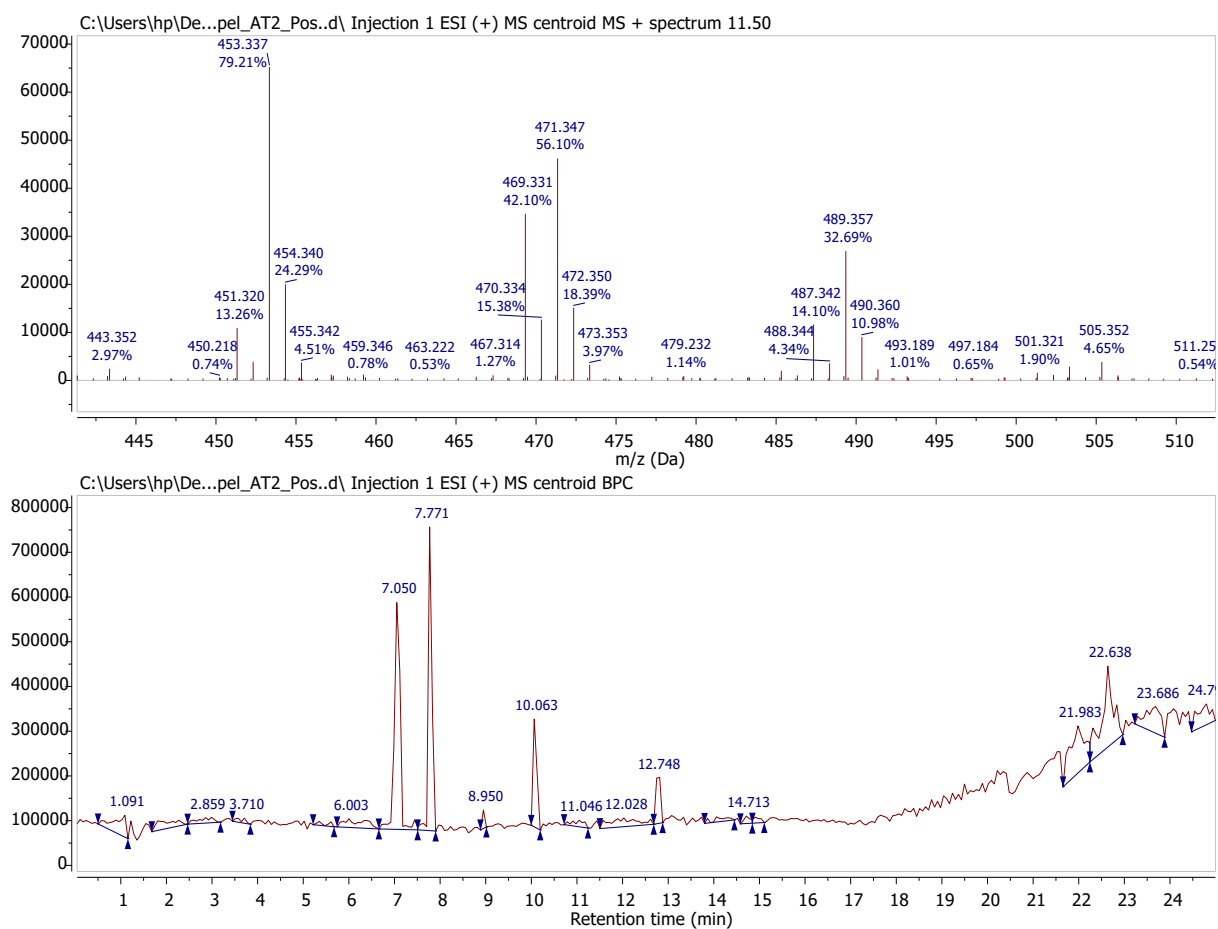

Fig. S10 Mass spectrum of arjunolic acid from *Terminalia chebula* (bark)

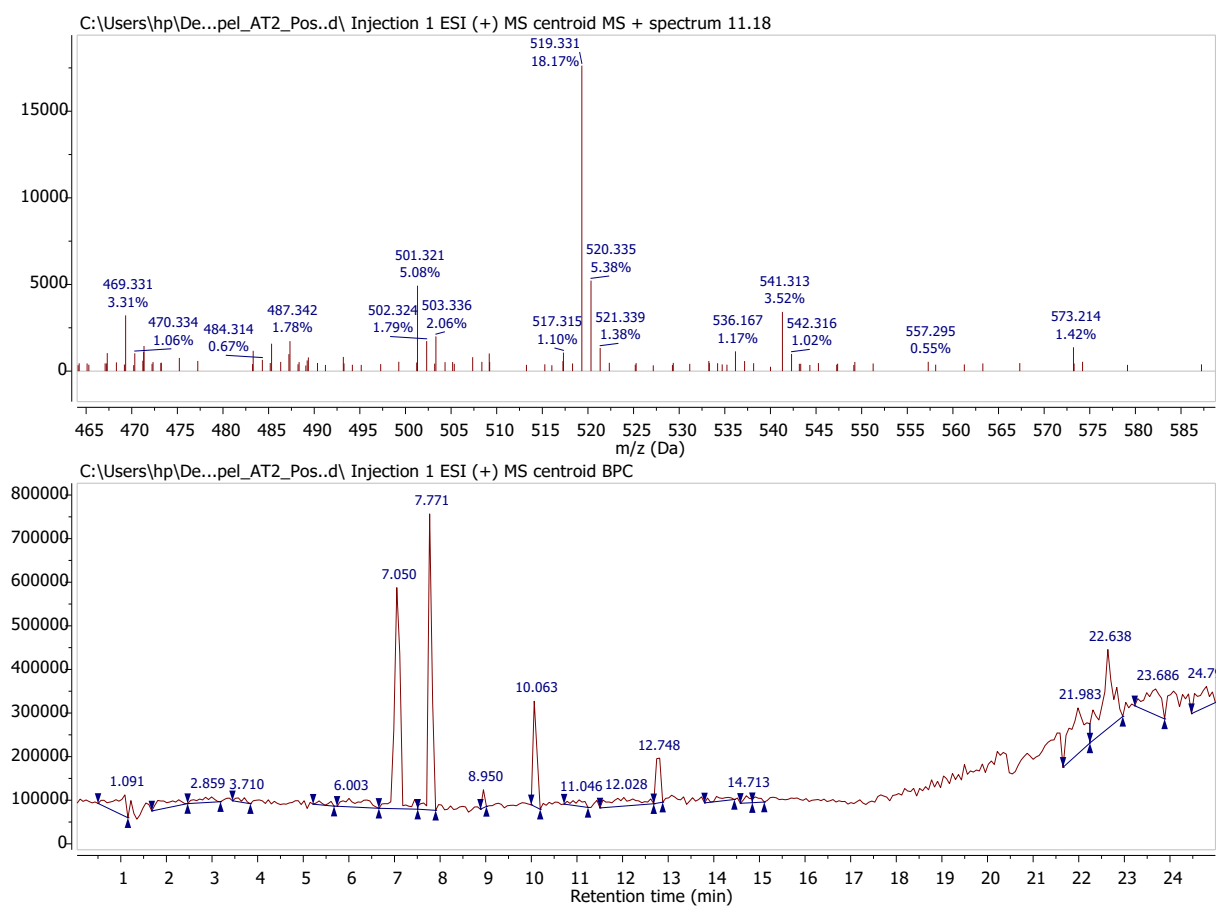

Fig. S11 Mass spectrum of bartogenic acid from *Terminalia chebula* (bark)

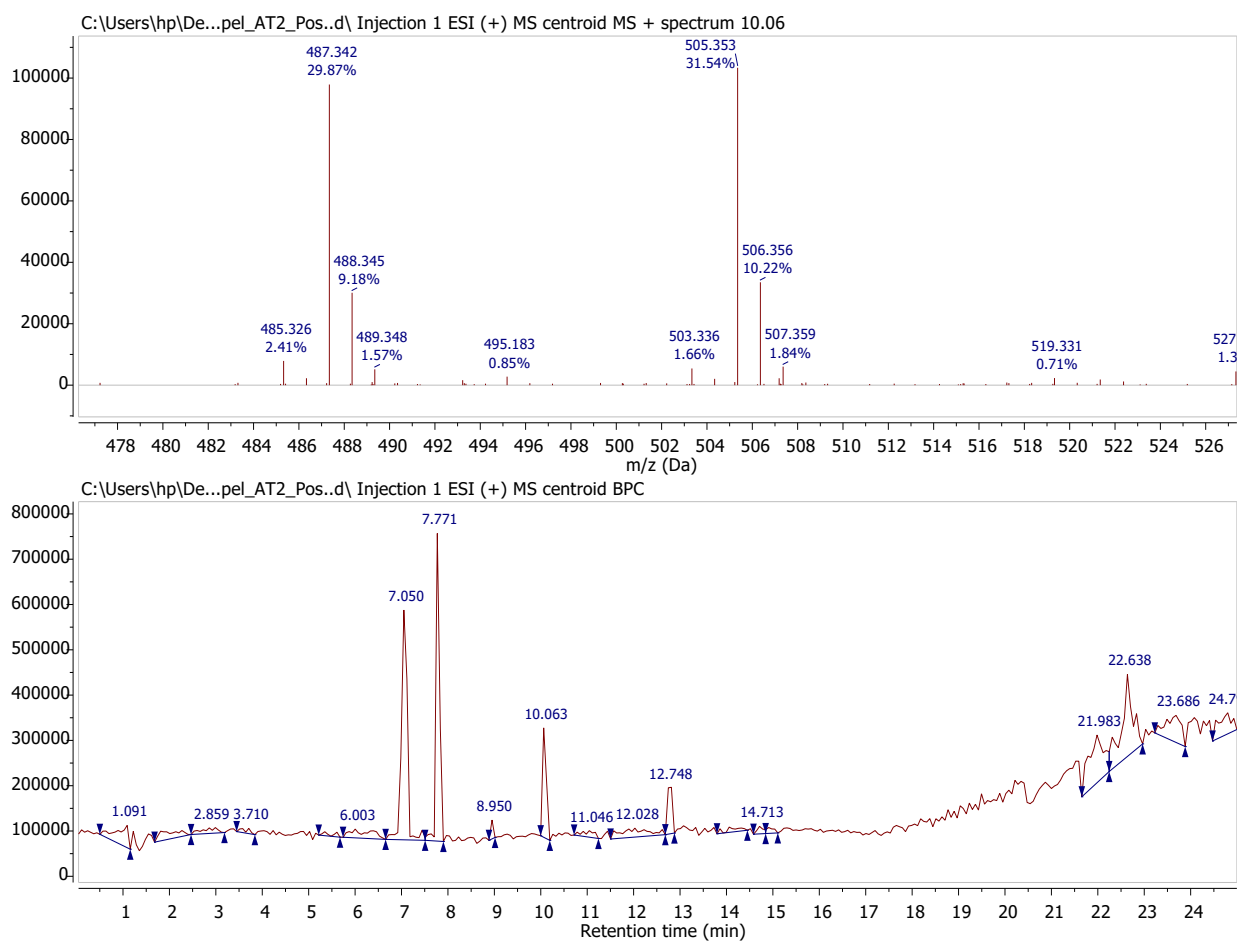

Fig. S12 Mass spectrum of arjungenin from *Terminalia chebula* (bark)

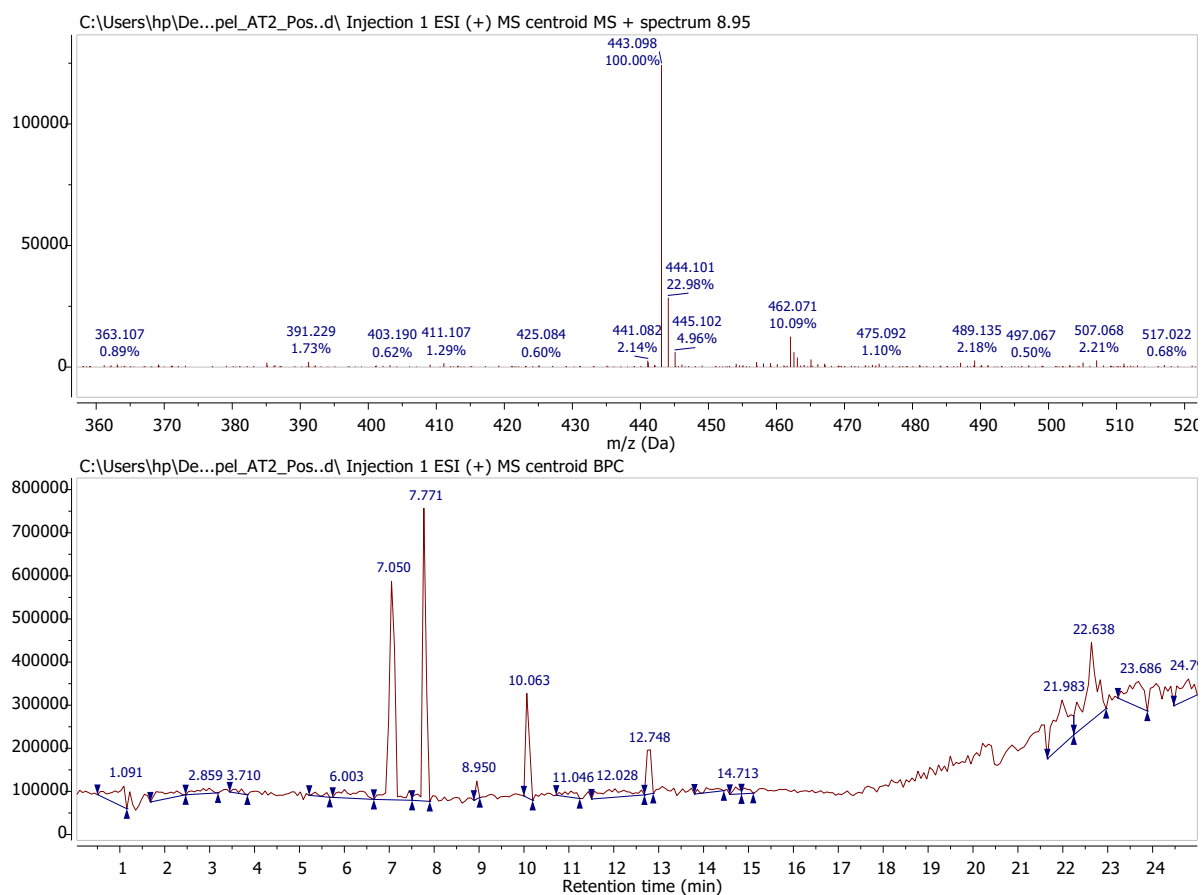

Fig. S13 Mass spectrum of (-)-epicatechin-3-O-gallate from *Terminalia chebula* (bark)

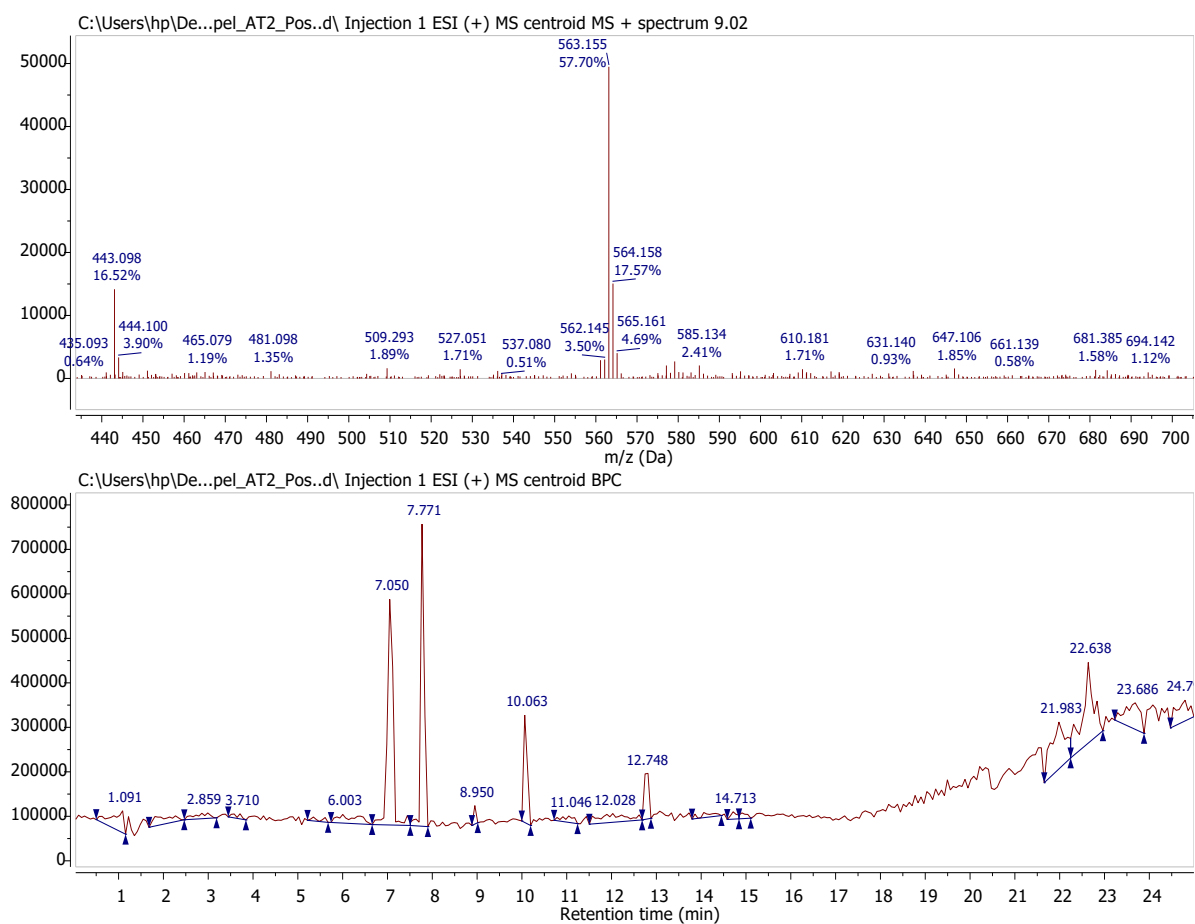

Fig. S14 Mass spectrum of gambiriin B1 from *Terminalia chebula* (bark)

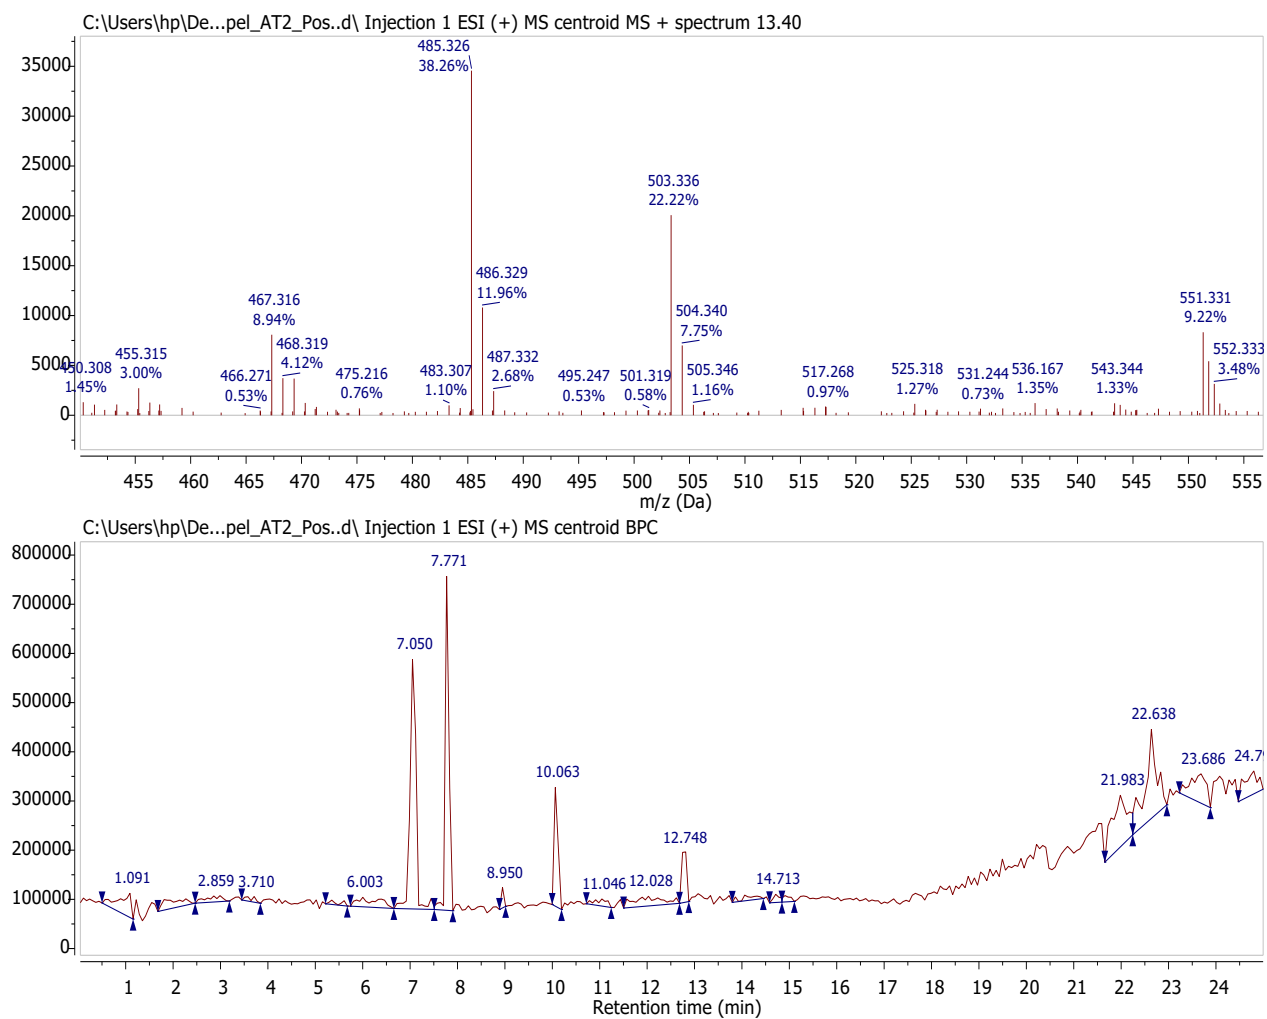

Fig. S15 Mass spectrum of rotundioic acid from *Terminalia chebula* (bark)



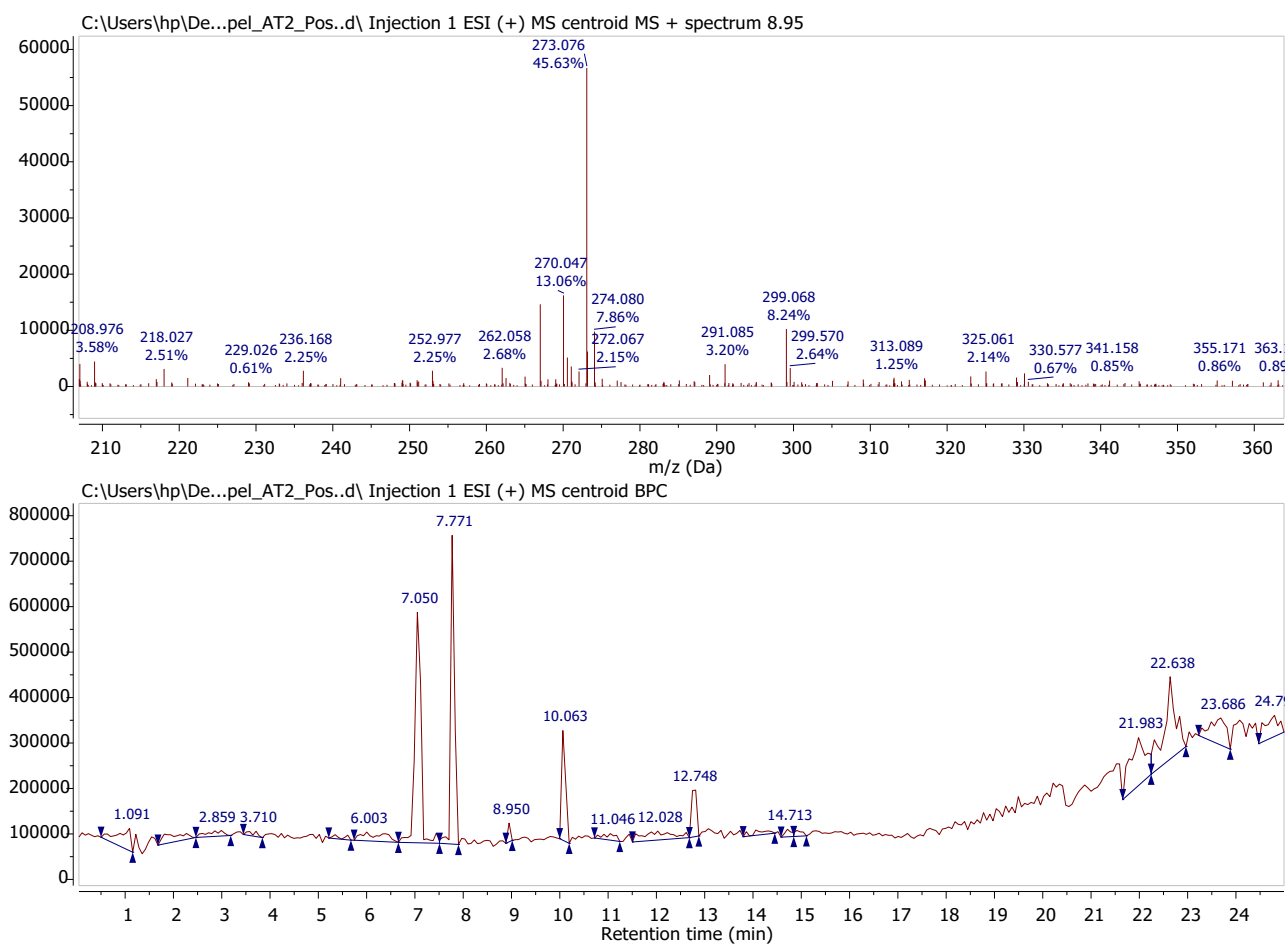

Fig. S16 Mass spectrum of butin from *Terminalia chebula* (bark)

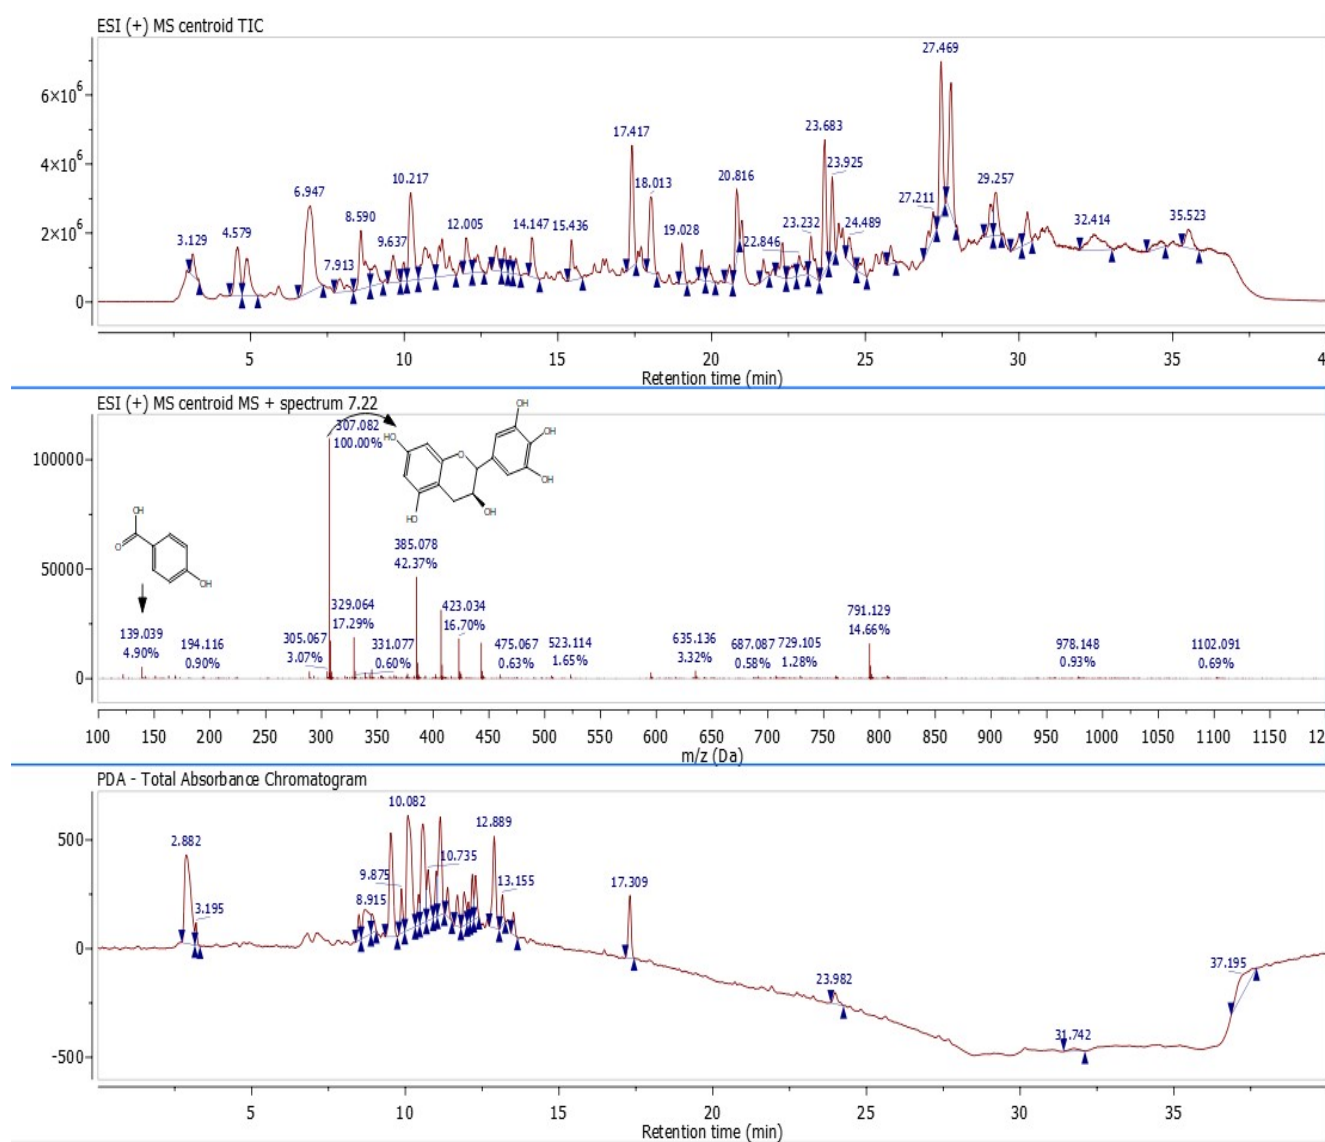

**Fig. S17** Mass spectrum of gallicatechin or epigallocatechin from *Cleistocalyx operculatus*

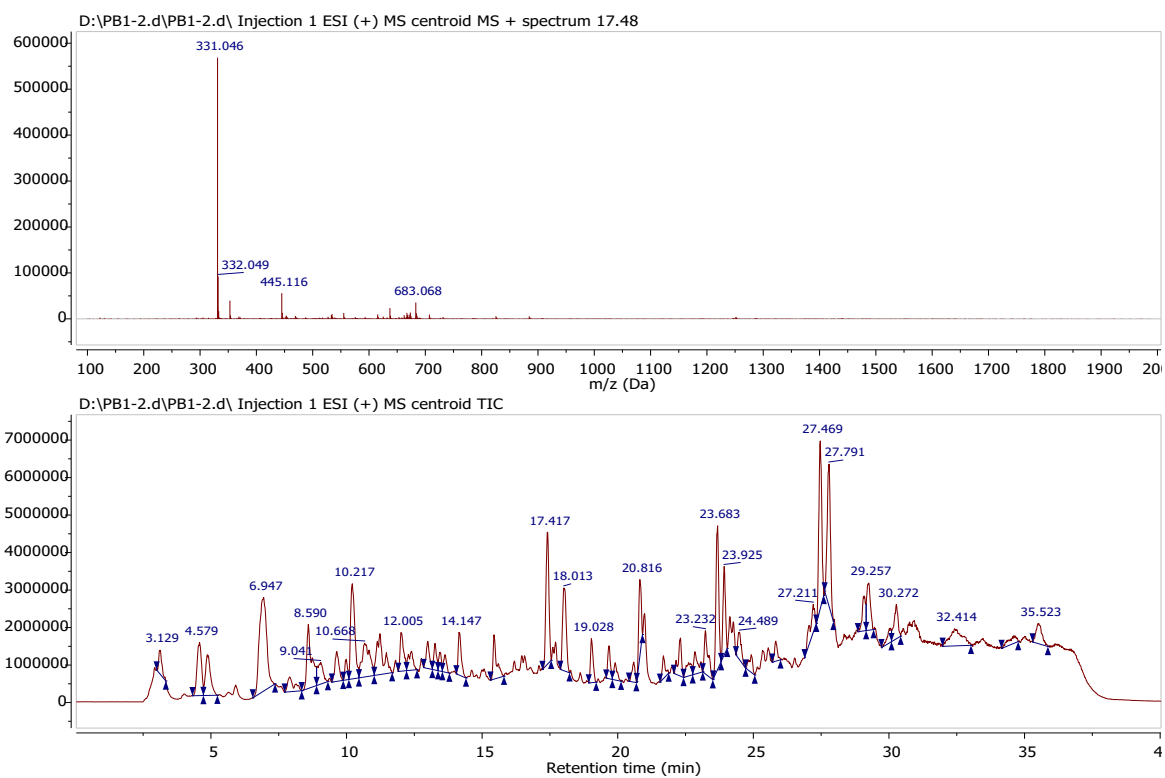

**Fig. S18** Mass spectrum of 4,4'-di-O-methylellagic acid from *Cleistocalyx operculatus*

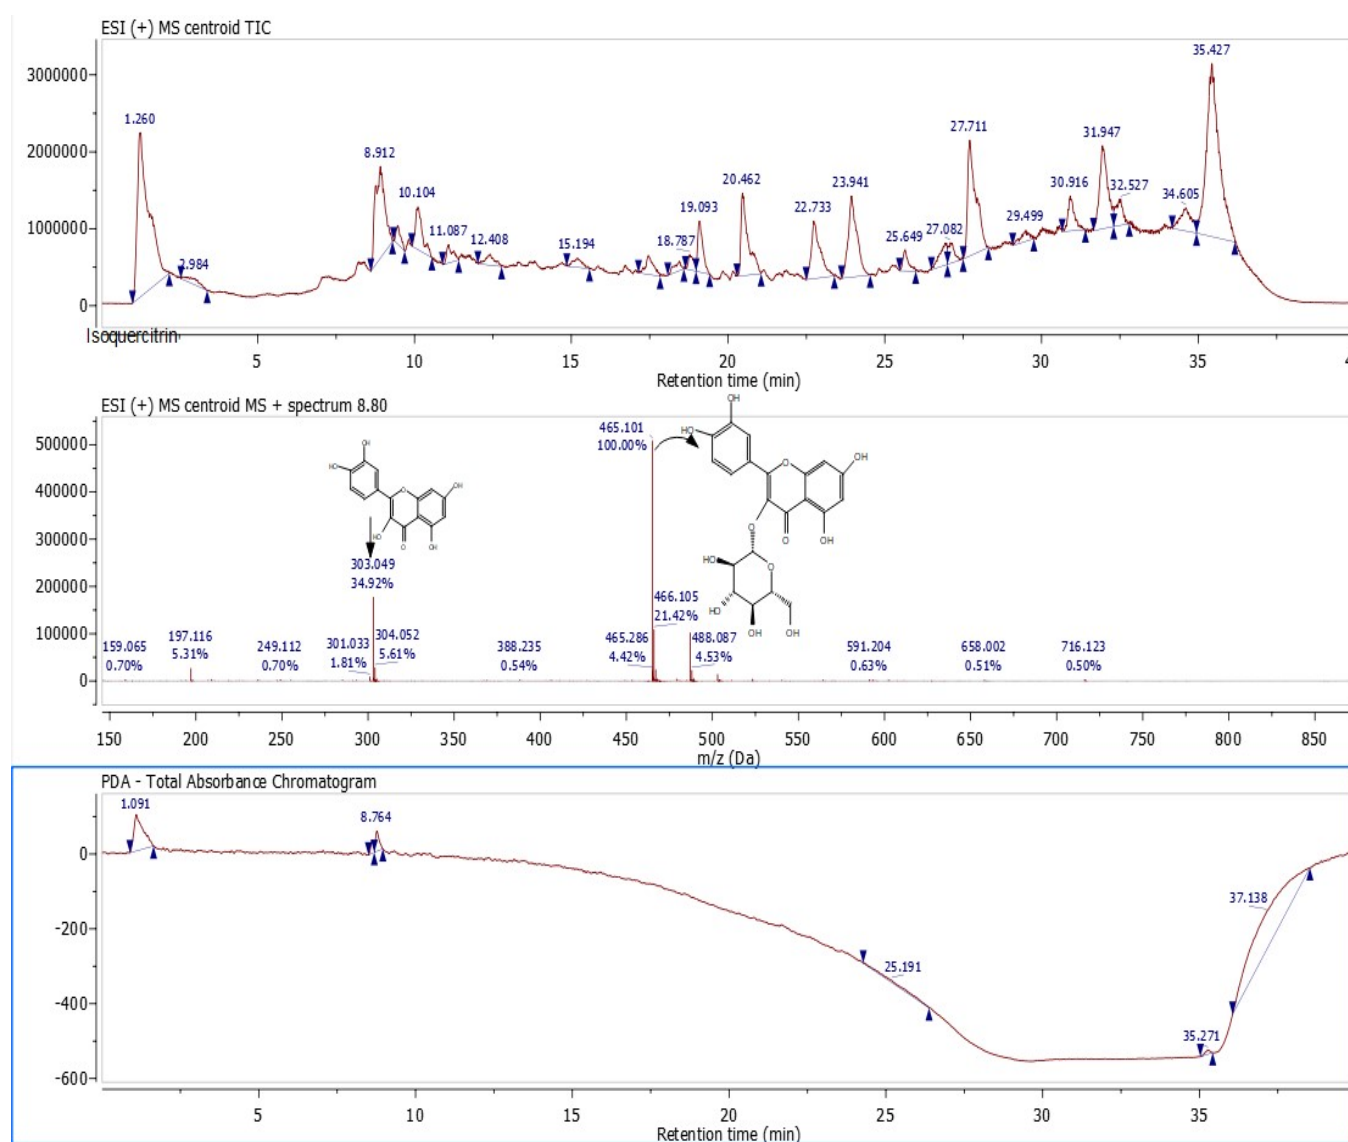

Fig. S19 Mass spectrum of isoquercitrin from *Ficus lacor*

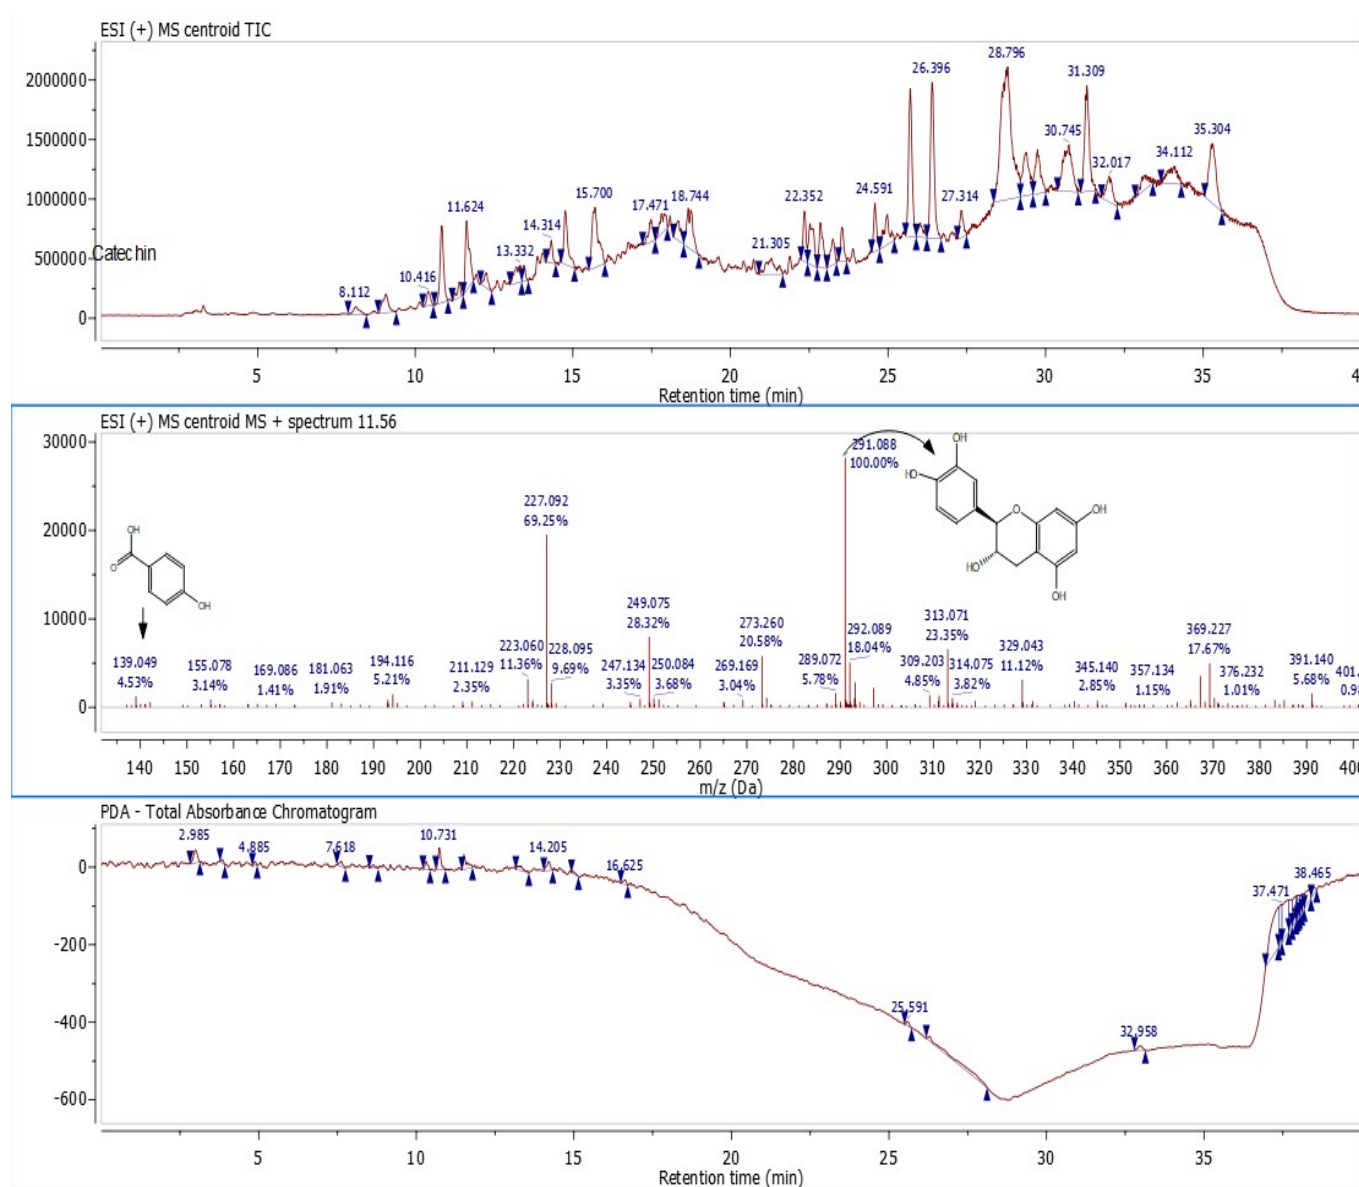

Fig. S20 Mass spectrum of catechin from *Ficus Semicordata*

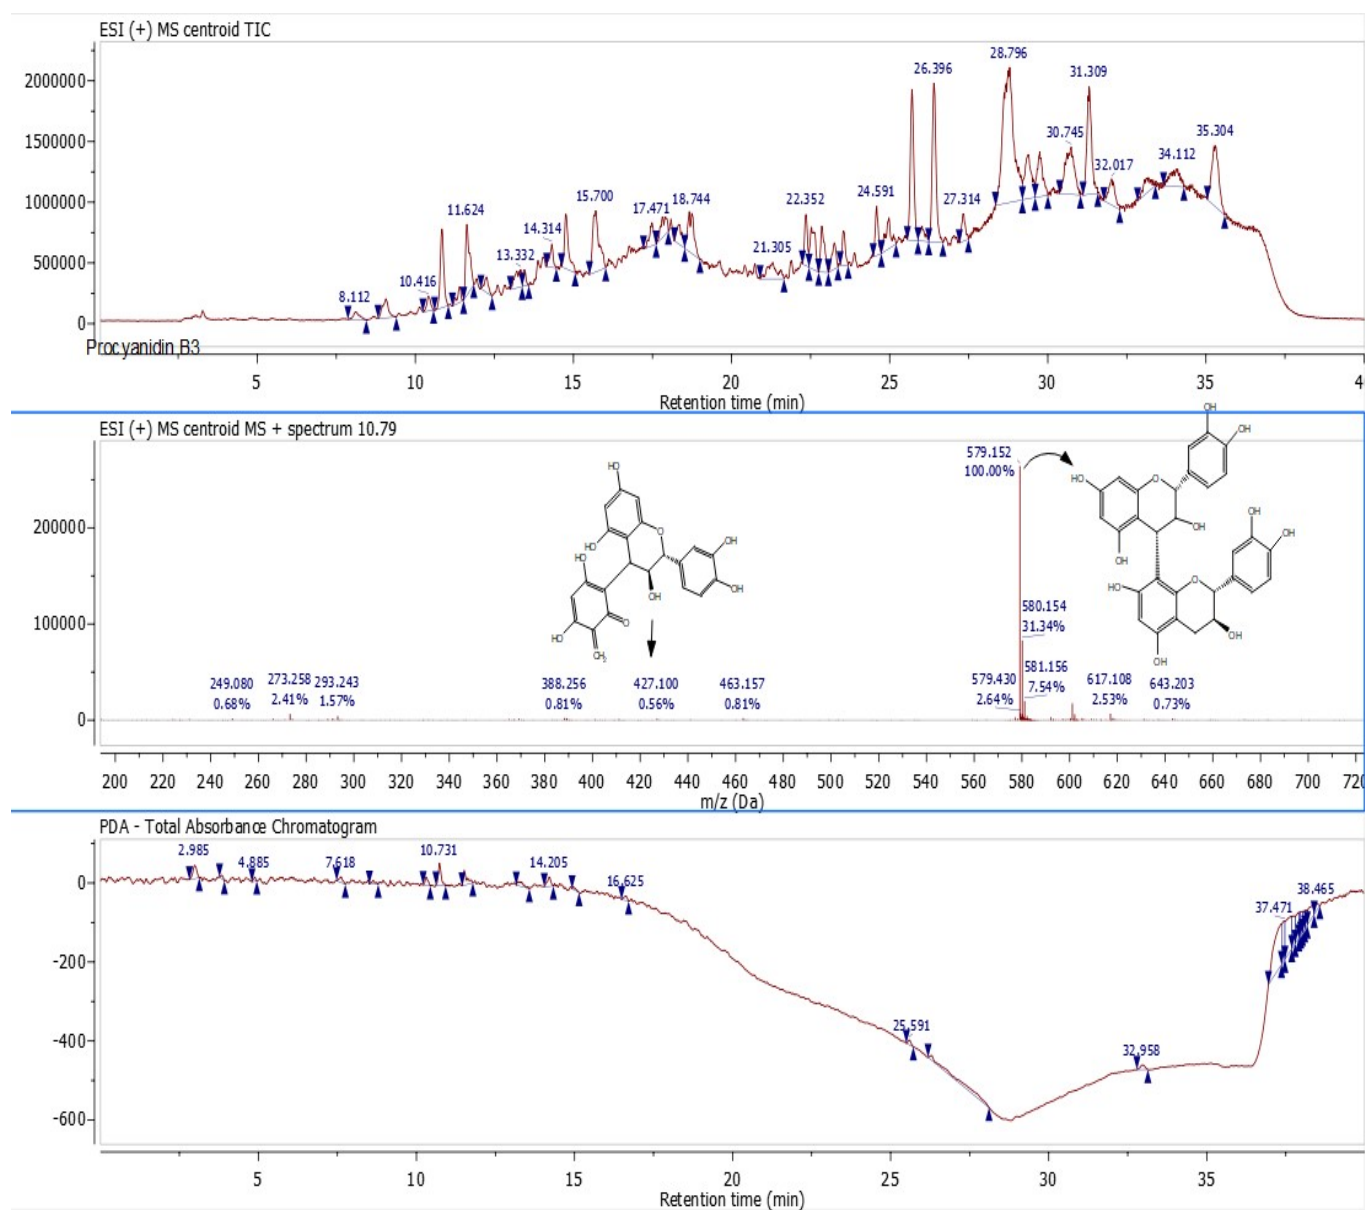

Fig. 21 Mass spectrum of procyanidin B2 from *Ficus semicordata*

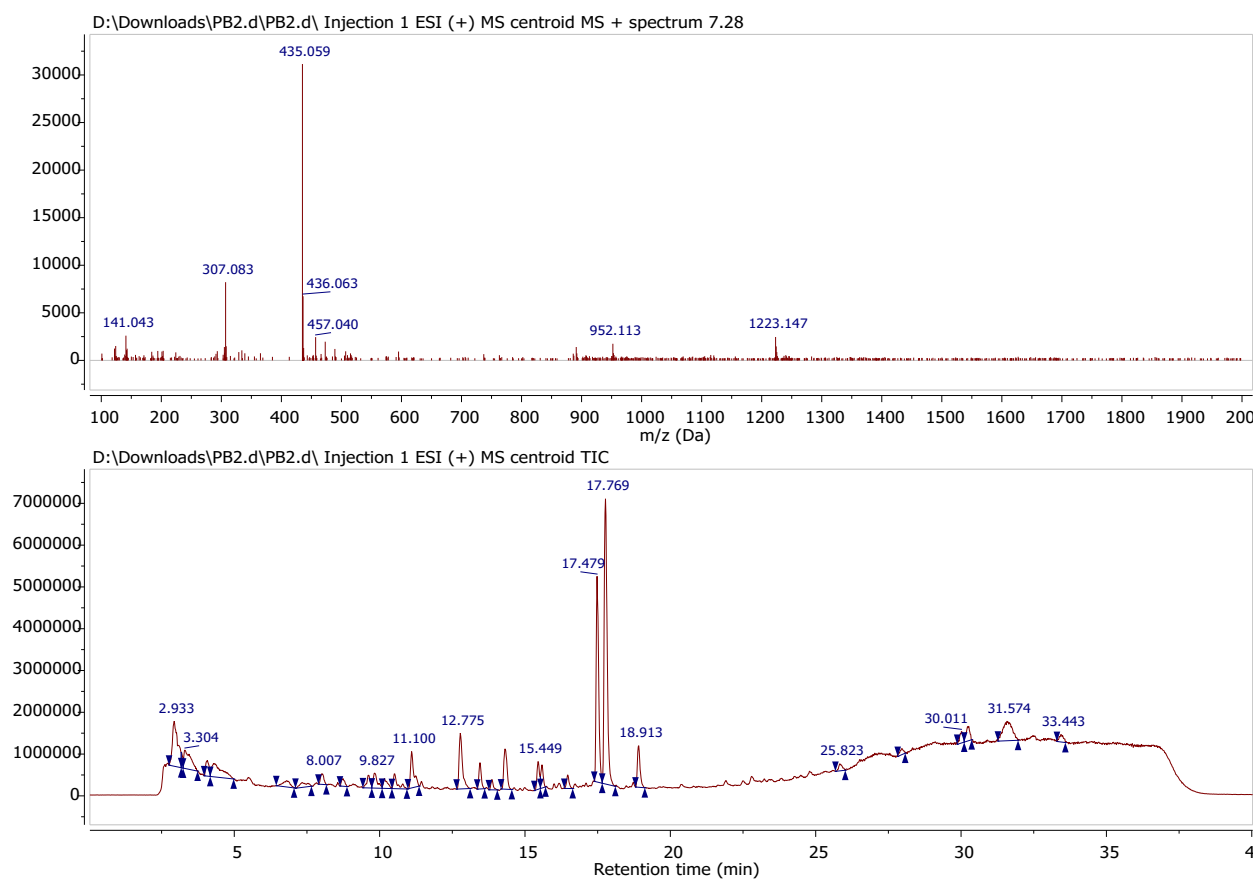

**Fig. S22** Mass spectrum of ellagic acid-*O*-pentoside from *Cleistocalyx operculatus*

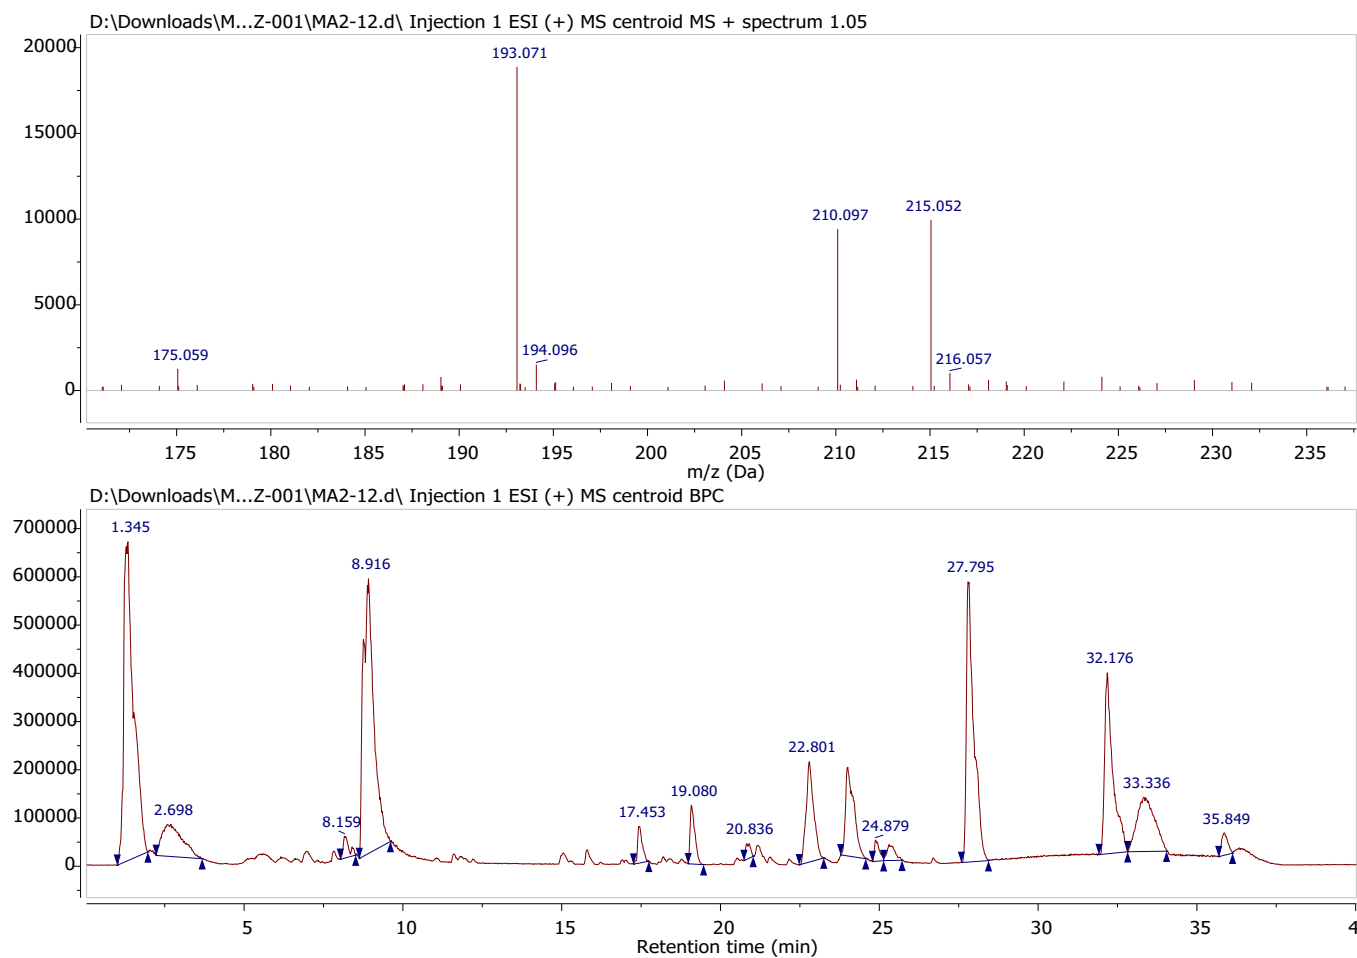

Fig. S23 Mass spectrum of quinic acid from *Ficus lacor*



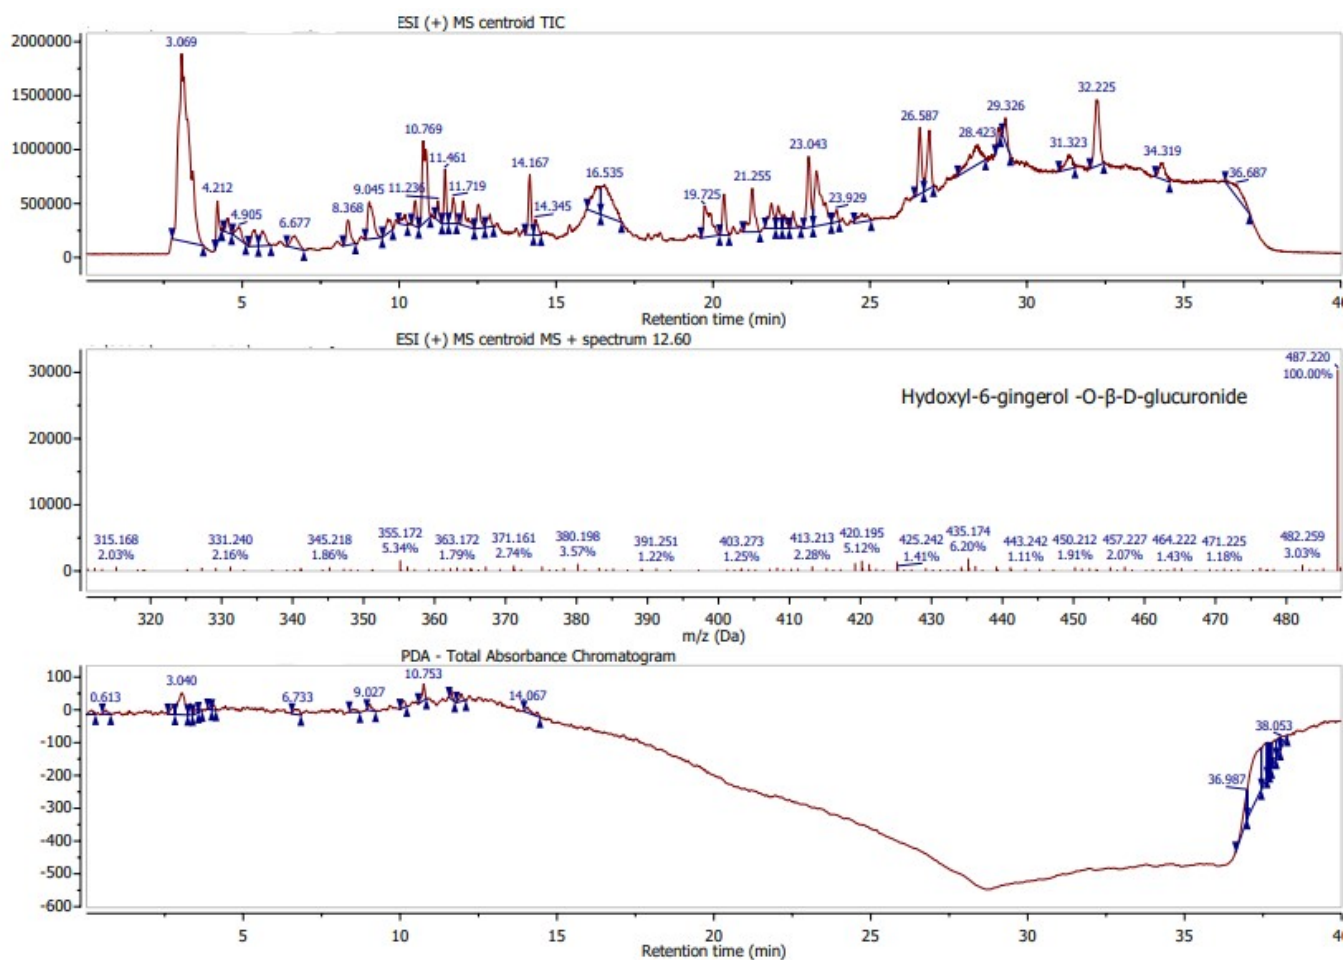

Fig. S24 Mass spectrum of hydroxyl-6-gingerol-O- $\beta$ -D-glucuronide from *Ficus semichordata*

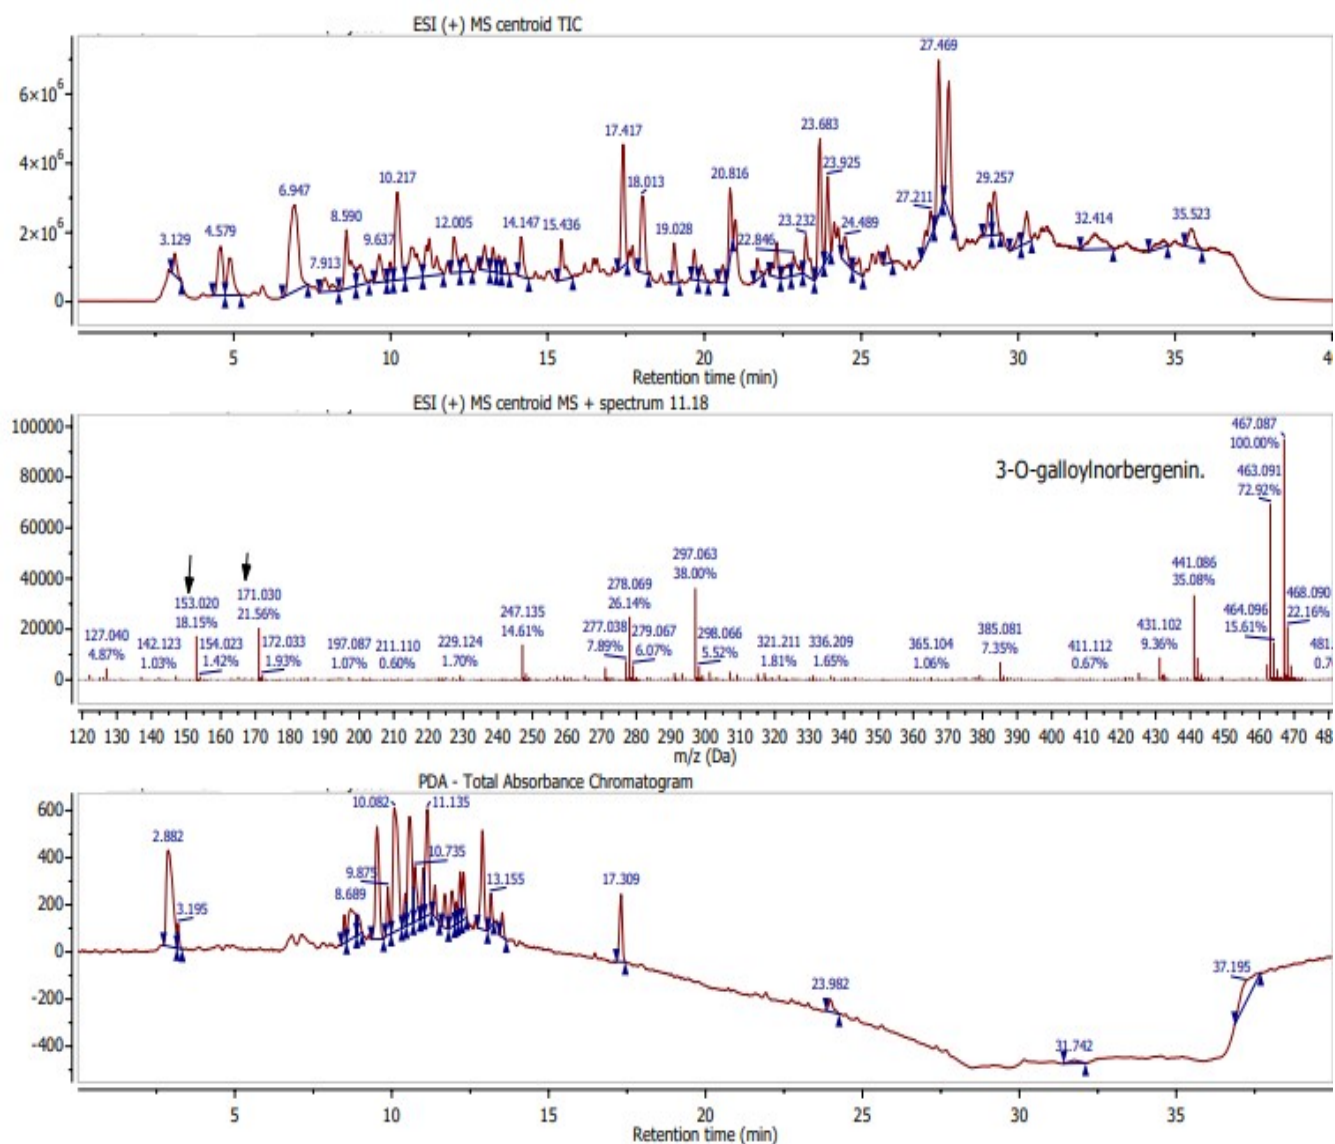

Fig. S25 Mass spectrum of 3-O-galloylnorbergenin from *Cleistocalyx operculatus*

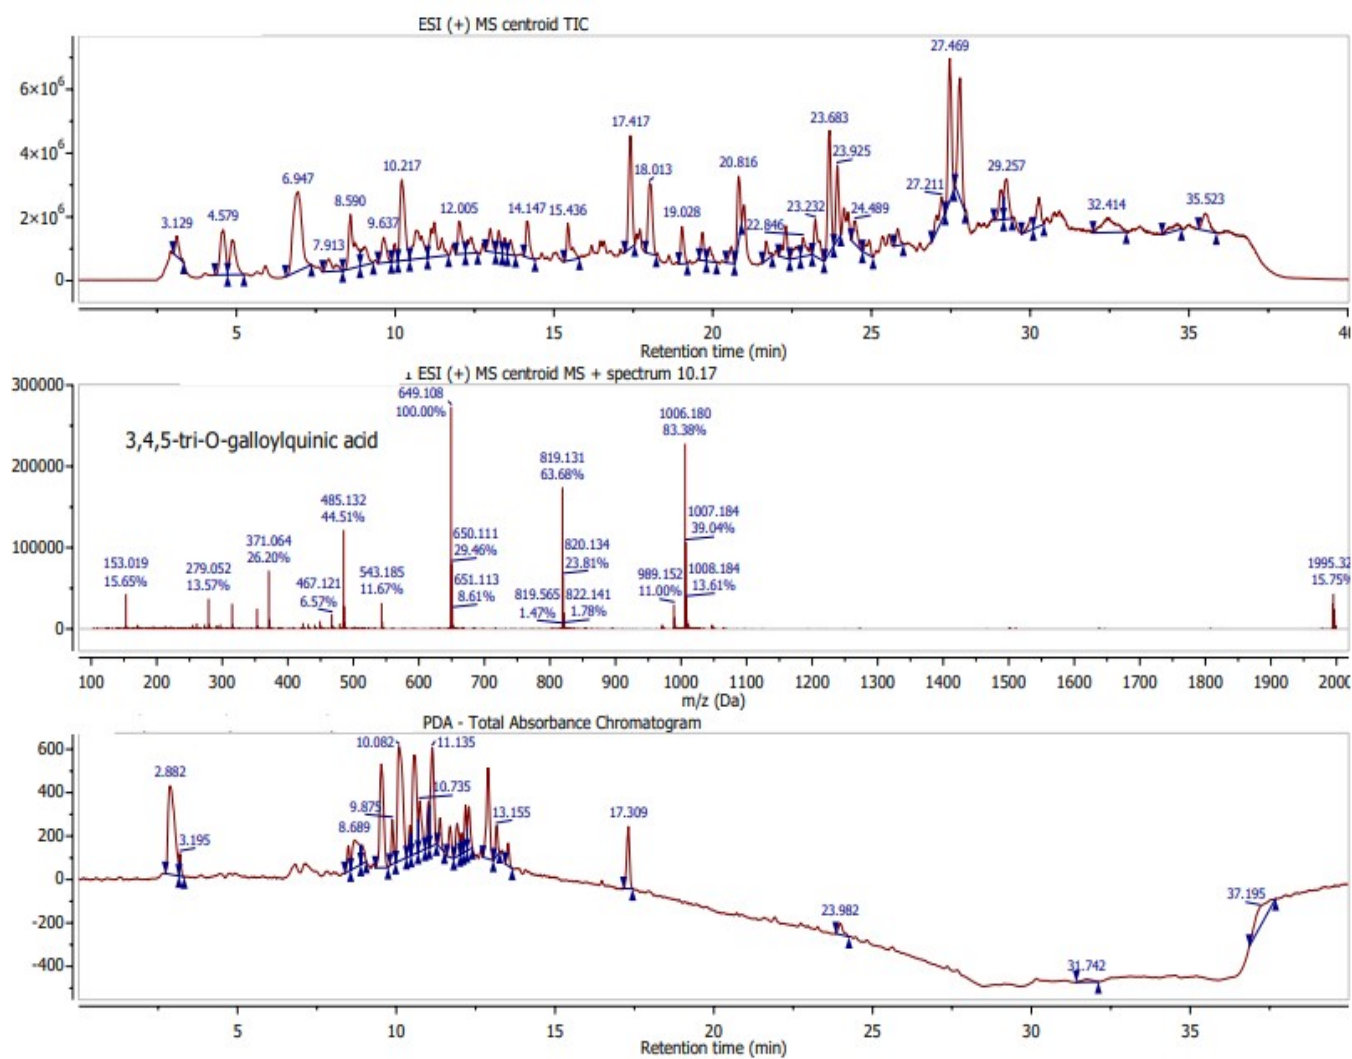

Fig. S26 Mass spectrum of 3,4,5-tri-O-galloylquinic acid from *Cleistocalyx operculatus*

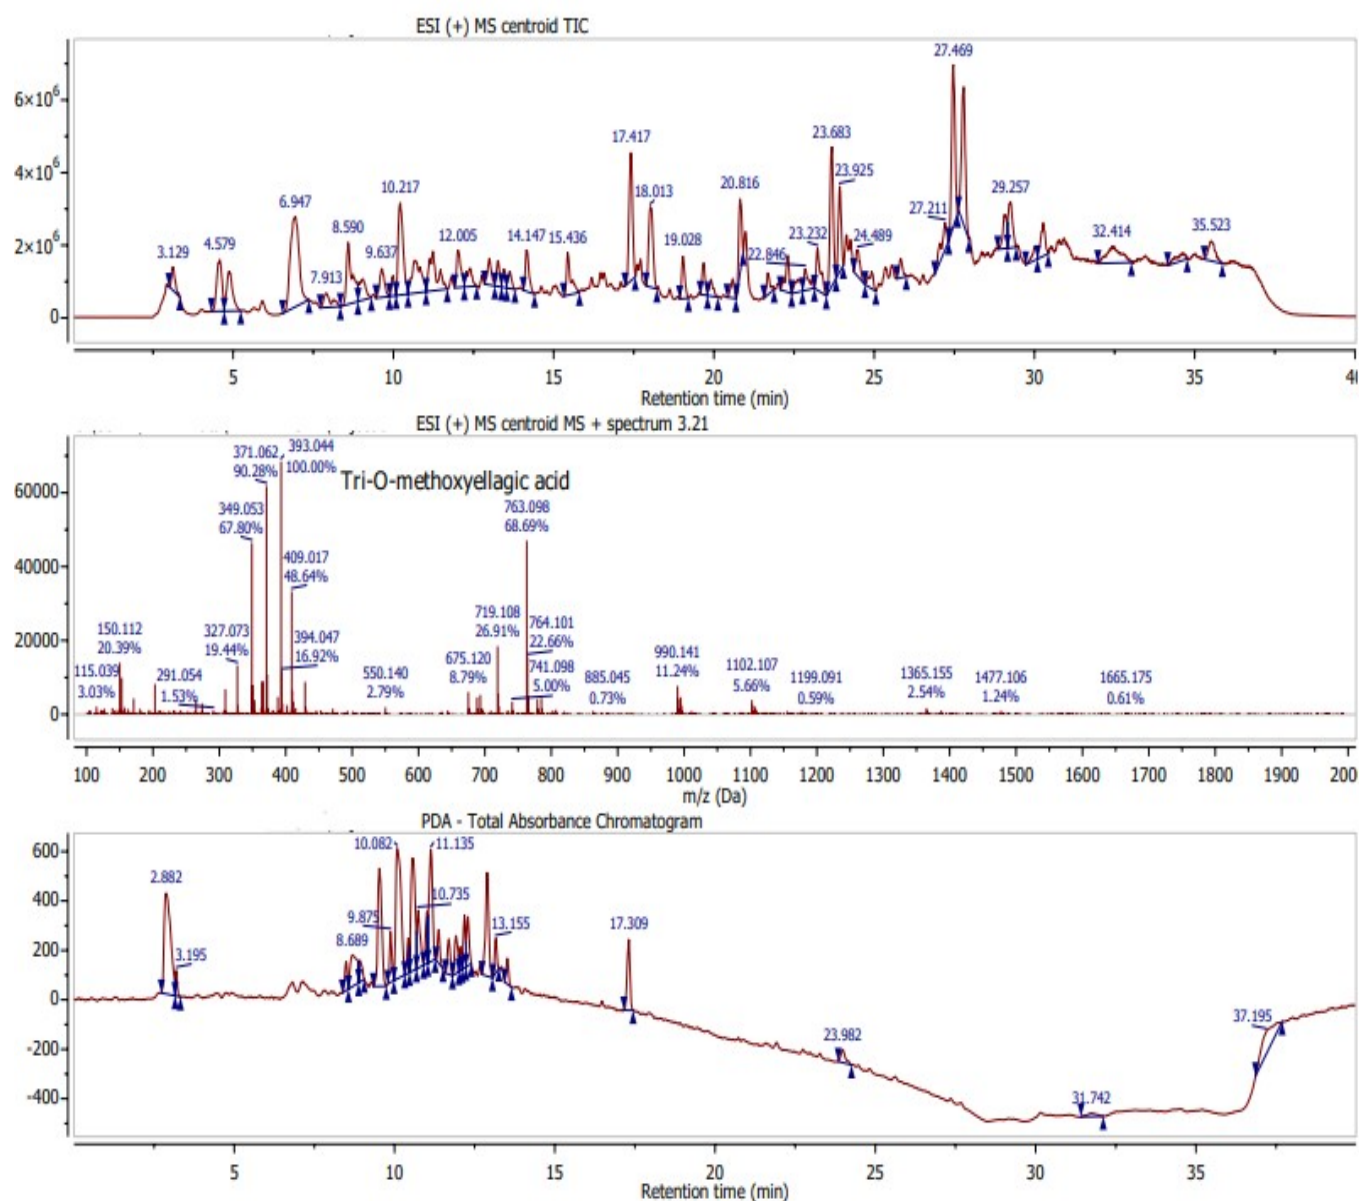

Fig. S27 Mass spectrum of tri-O-methoxyellagic acid from *Cleistocalyx operculatus*

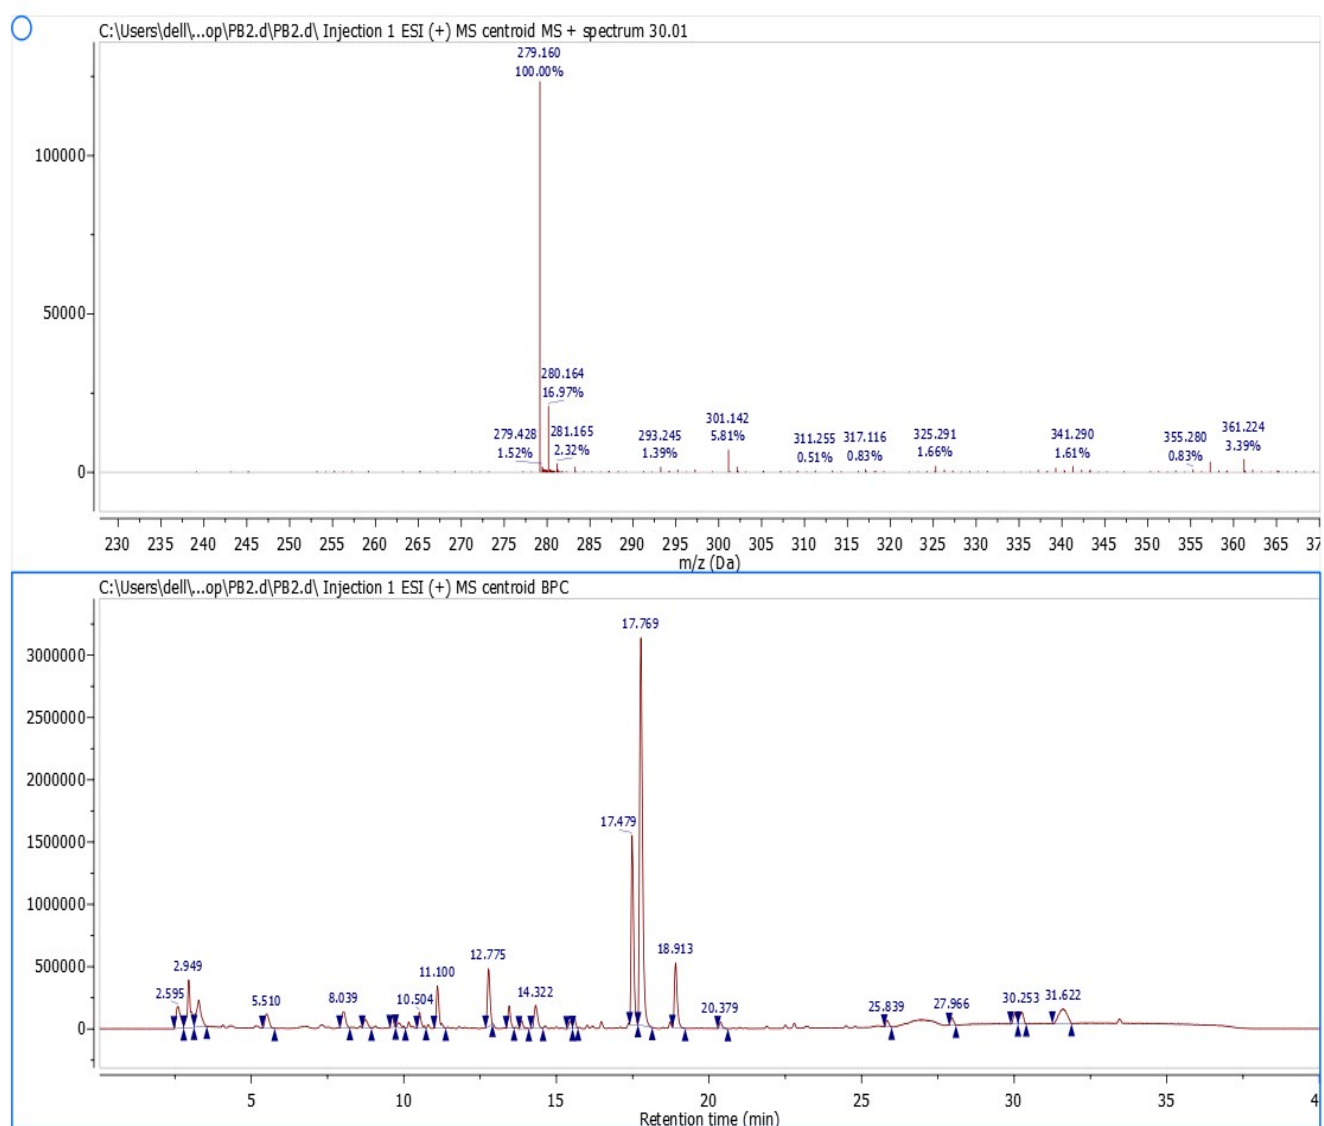

**Fig. S28** Mass spectrum of butyl isobutyl phthalate from *Cleistocalyx operculatus*

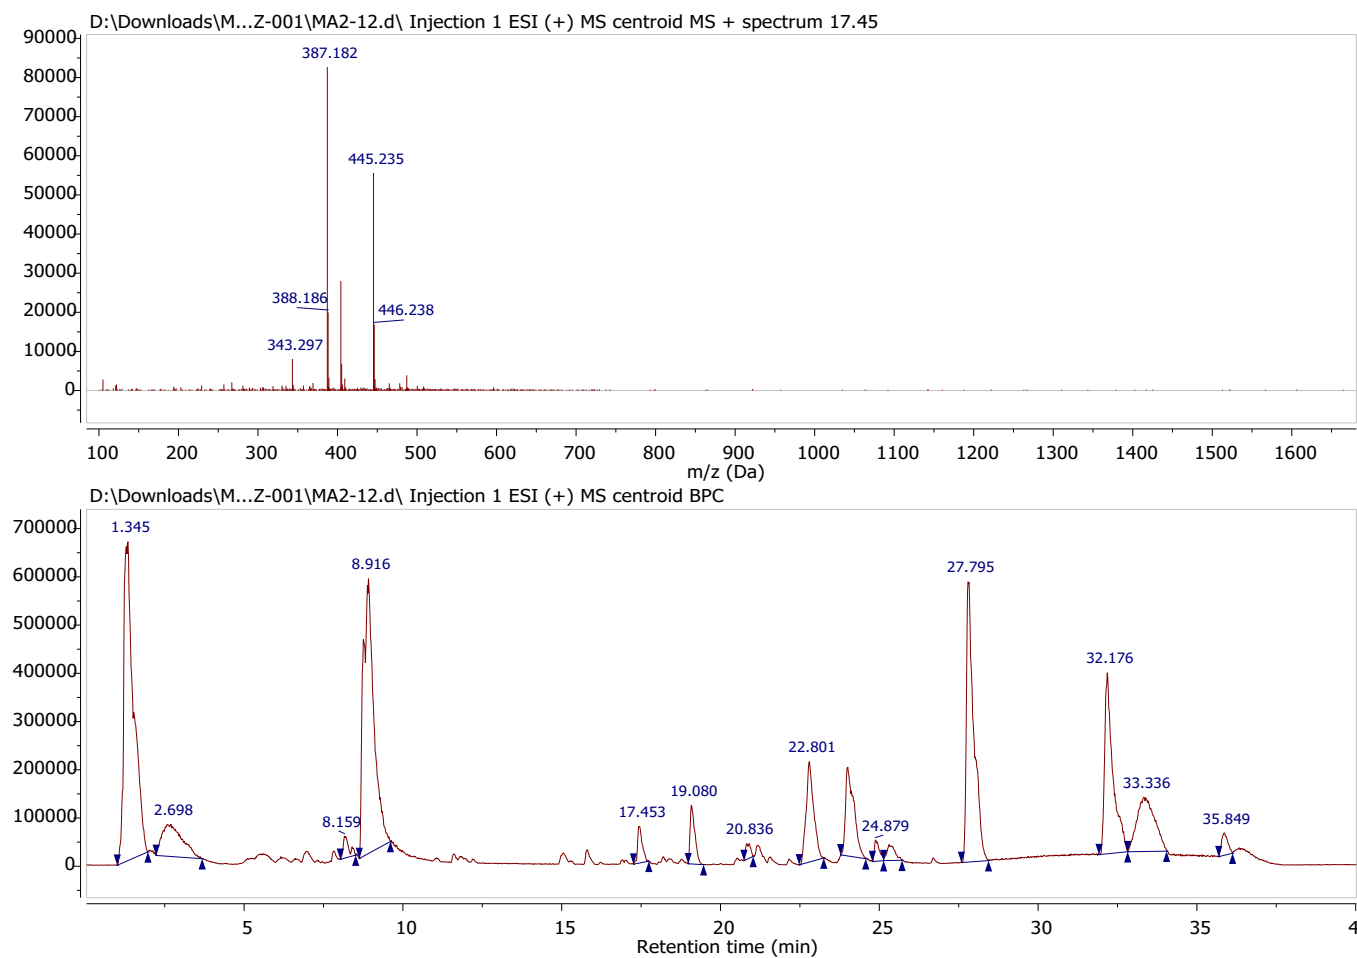

Fig. S29 Mass spectrum of eudesmin from *Ficus lacor*

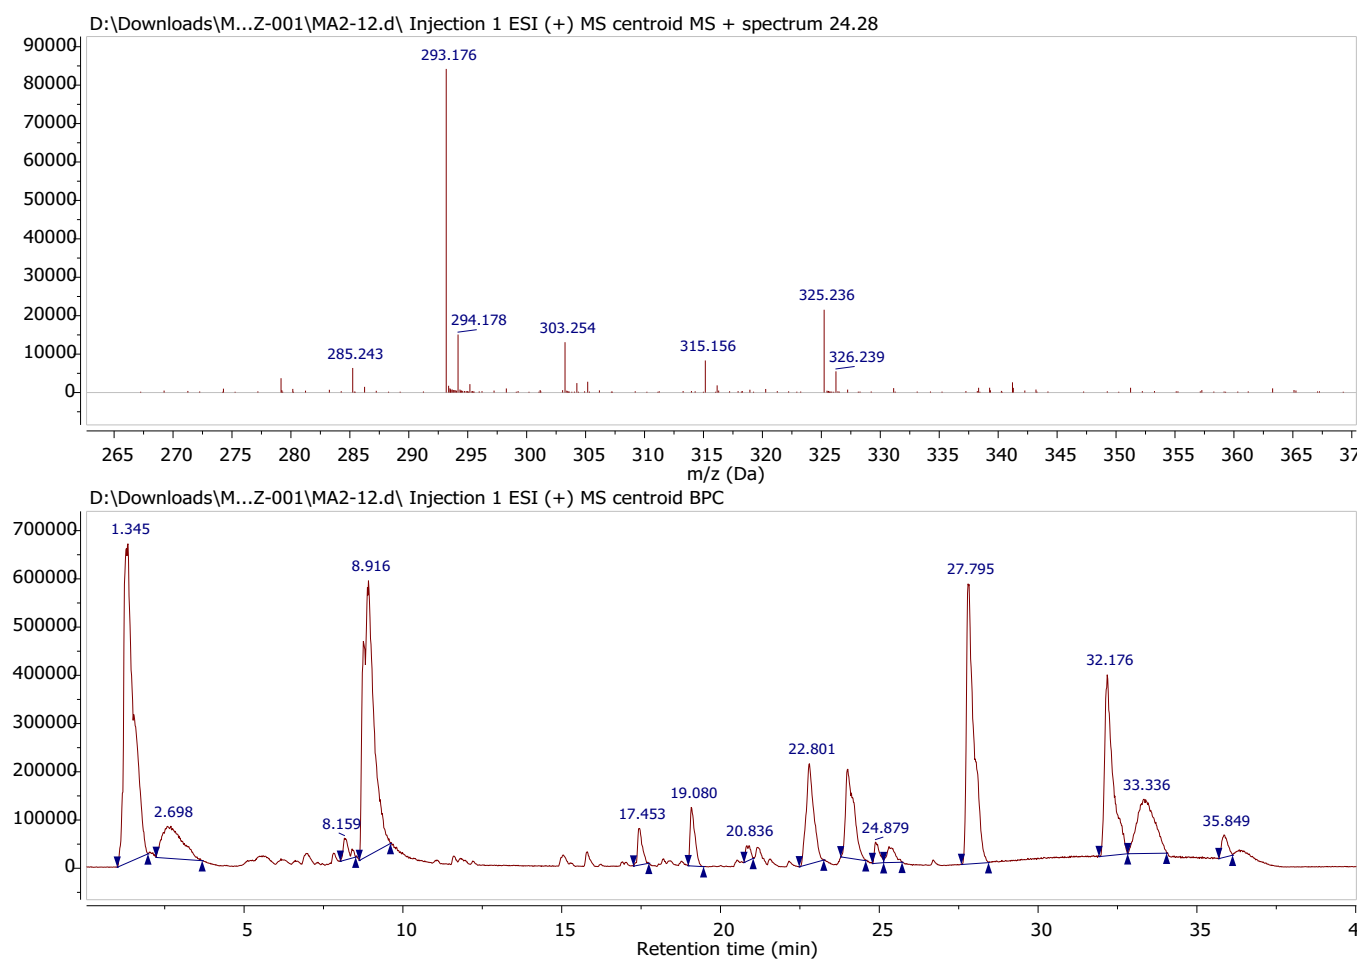

Fig. S30 Mass spectrum of lasiodiplodin from *Ficus lacor*

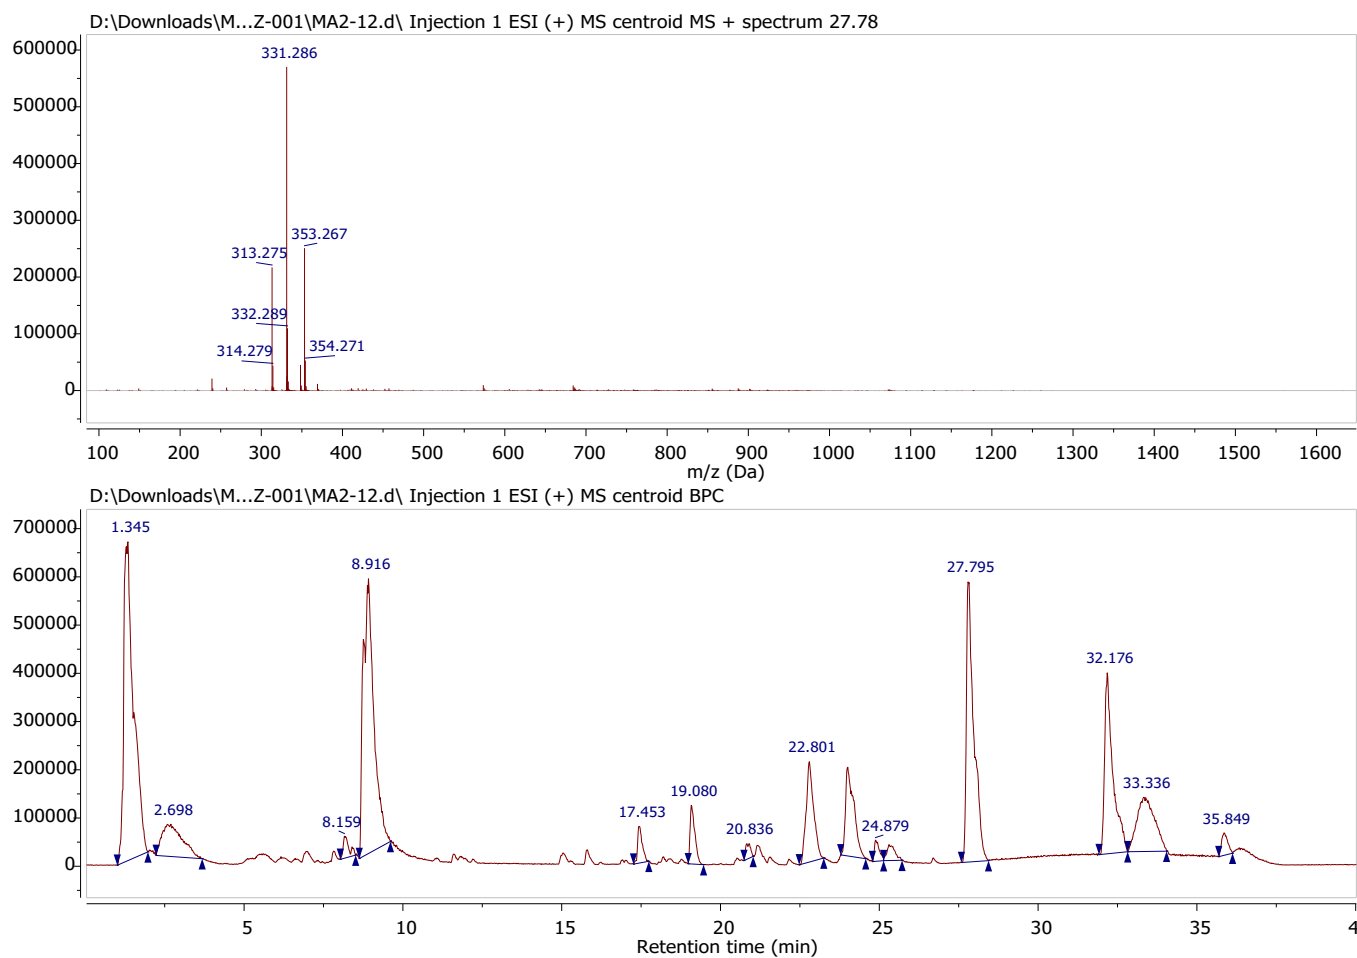



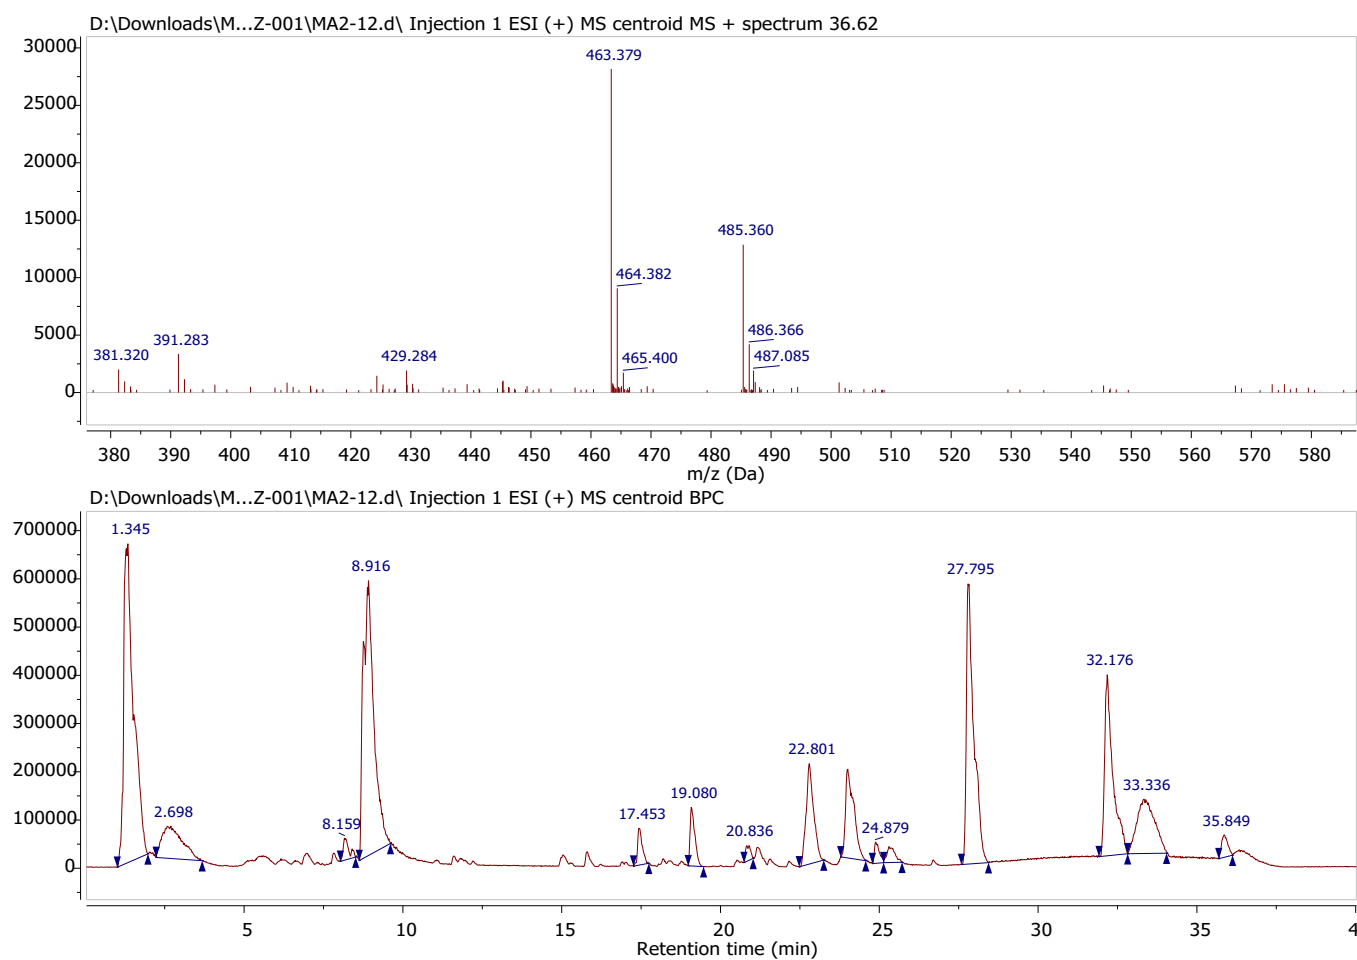

Fig. S32 Mass spectrum of  $\alpha$ -tocospiro B from *Ficus lacor*
